# Supplementary material for: Type II restriction modification system in Ureaplasma parvum OMC-P162 strain
Source: PLoS One. 2018 Oct 16;13(10):e0205328. doi: 10.1371/journal.pone.0205328 (PMC6191088; doi:10.1371/journal.pone.0205328)
Supplement: S5 Table — (XLSX) [file pone.0205328.s008.xlsx]

## Sheet: m6A
S5_Table
Seqid	Type	Position	Score	Strand	Coverage	Context	context2	frac	fracLow	fracUp	identificationQv
contig.1.cir	m6A	243221	24	+	436	AAAACAACACTTTTTAAAC	cAtgAAAAAATTAAAATTGTTT	0.02	0.015	0.039	50
contig.1.cir	m6A	117101	32	-	512	CGAAATTTCCAATATTATT	cAtgAAAAAATTTTAACCATAA	0.015	0	0.034	17
contig.1.cir	m6A	592073	30	+	625	TATTTTTTATCCTTTTTGA	cAtgAAAAATCTAAAATAACTA	0.563	0.383	0.648	96
contig.1.cir	m6A	645823	22	+	625	AAGATGTTTATCCTGCTAT	cAtgAAAAATTATCGTCAAATG	0.015	0	0.02	49
contig.1.cir	m6A	524883	31	-	546	AAAACATTAGGAACAAAAG	cAtgAAAAATTATTTTAAATTT	0.015	0.012	0.031	50
contig.1.cir	m6A	410801	34	-	465	TAATAAAAATACAAAAAAA	cAtgAAAAATTTGGGGAAATTG	0.023	0	0.045	16
contig.1.cir	m6A	220695	21	+	454	TAGTTTGAAATCATCATTC	cAtgAAATAAAATAGAATTTTA	0.072	0.04	0.115	53
contig.1.cir	m6A	502777	26	-	523	TGTTAAATTAAATGATGAG	cAtgAAATAATTAATGTTGATT	0.116	0.061	0.167	183
contig.1.cir	m6A	122198	26	-	509	TGTGAATCACGAATTAAAC	cAtgAATTAAAACATCCTTAAA	0.015	0	0.023	69
contig.1.cir	m6A	450387	28	+	477	CCAGAAAATTGTTGACTAC	cAtgAATTAAAATACTTCCAGC	0.015	0	0.018	89
contig.1.cir	m6A	156814	30	-	458	TTTTTTTAATATTAATTTG	cAtgAATTATATTTACTTAAAT	0.074	0.044	0.11	59
contig.1.cir	m6A	83578	22	-	531	ATAATTTTGTTACGAACTG	cAtgAATTTCTTTTAAATAAAA	0.031	0.014	0.048	26
contig.1.cir	m6A	79722	21	+	572	AAATATTTACTTTTCAAAG	cAtgAGTTAAcAtgAGTGCCAG	0.047	0.023	0.074	114
contig.1.cir	m6A	254393	28	+	418	ATCAAAAACAACATTAATG	cAtgATTTACAAATTTGATATA	0.061	0.035	0.091	110
contig.1.cir	m6A	716449	74	-	560	TGTTCACCAACAATTGGTG	cAtgCAAAAAATTTAAAACTGC	0.058	0.032	0.091	202
contig.1.cir	m6A	711157	22	+	598	AACTTGTTTTGGGGTTTGG	cAtgCAAAAATATTTTATAAAA	0.031	0.015	0.057	123
contig.1.cir	m6A	306520	32	-	398	CTTCACAAACTTTAAATAG	cAtgCAAACAATTAGTAGTGTT	0.043	0.017	0.072	133
contig.1.cir	m6A	450786	22	+	479	TCACCTTTTGATTTAAGTT	cAtgCAAATAATCTTGACTTTT	0.045	0.021	0.074	54
contig.1.cir	m6A	338539	167	-	446	TTTTATTACGTAAGATTAT	cAtgCAACACTATGAACACCCT	0.277	0.21	0.345	89
contig.1.cir	m6A	729398	88	-	391	AGAAACAGATGCATAAATA	cAtgCAACAGAAGCAACAACAA	0.278	0.207	0.355	88
contig.1.cir	m6A	108377	35	+	544	TAATGGAATTGCATATATT	cAtgCAACTAAAAATAATACGA	0.061	0.029	0.092	52
contig.1.cir	m6A	412708	130	-	473	ATATGACAATCATAAATTT	cAtgCAACTGTTTTCTTGCTCC	0.209	0.143	0.269	102
contig.1.cir	m6A	541958	325	-	623	TTAATTTGCTCAGAAAATT	cAtgCAATAATCGCTCGTTTTC	0.365	0.306	0.435	135
contig.1.cir	m6A	67468	295	-	561	TAAGTTTCAATATTATTTT	cAtgCAATACCTTAATTGTTTC	0.384	0.32	0.444	76
contig.1.cir	m6A	590292	123	-	571	TGTTAAAAAAAATGAAATT	cAtgCAATTATTGGTGAAAATG	0.105	0.059	0.155	16
contig.1.cir	m6A	524014	51	-	542	ATTTTATGAAGGTGAAGTC	cAtgCAATTATTGGTGAATCAG	0.218	0.156	0.292	122
contig.1.cir	m6A	605571	47	+	606	ACAATTGCTAATTTGCAAC	cAtgCACATATCCTGGATCAAA	0.023	0.015	0.044	8
contig.1.cir	m6A	130159	96	+	522	ATGCAAGATAATTGAATTG	cAtgCACCAAATCATTCAGTTA	0.065	0.035	0.095	107
contig.1.cir	m6A	402467	164	+	495	CTTACTTTTTGATTTAGTG	cAtgCACCAATTAAGCAAGATA	0.17	0.122	0.212	135
contig.1.cir	m6A	716448	297	+	606	AGCAGTTTTAAATTTTTTG	cAtgCACCAATTGTTGGTGAAC	0.612	0.551	0.694	222
contig.1.cir	m6A	483514	94	+	513	TTCAAAAATCACTTGACGA	cAtgCACCACAAGGACTCGCAA	0.09	0.051	0.132	19
contig.1.cir	m6A	717934	146	-	579	GACACGAGCTGACGACAAC	cAtgCACCACCTGTCATATTGT	0.505	0.445	0.575	387
contig.1.cir	m6A	310767	171	-	408	CAACCATTAAGTTTATAAG	cAtgCACCATTAGTTCATCACC	0.611	0.523	0.705	162
contig.1.cir	m6A	644365	177	+	605	TCGTAACGATATTTCTGAT	cAtgCACCTACATTCTTTGATT	0.391	0.326	0.461	92
contig.1.cir	m6A	153374	207	+	515	AATTACGATTTTAATTAAT	cAtgCACCTATTGATAAAATTG	0.586	0.51	0.679	160
contig.1.cir	m6A	99888	147	-	560	AATTTGACGCGCATCAATT	cAtgCACCTTCTAGTGCCATTA	0.212	0.145	0.275	63
contig.1.cir	m6A	402468	204	-	456	TTATCTTGCTTAATTGGTG	cAtgCACTAAATCAAAAAGTAA	0.322	0.254	0.396	213
contig.1.cir	m6A	98860	129	+	491	TGAAGGAAAAGATAAAGCA	cAtgCACTTGTAAGCAAAAAAG	0.133	0.079	0.194	39
contig.1.cir	m6A	574446	148	+	604	TTcAtgCGTGCACGAAAAC	cAtgCACTTTTGCTCTTTTACG	0.339	0.267	0.409	271
contig.1.cir	m6A	444450	40	+	493	AAAAAAAAAAATCTGCAAC	cAtgCAGATTTTAGTGTATCAA	0.015	0	0.015	99
contig.1.cir	m6A	75648	90	+	576	TATTAATGATAATCCAGAT	cAtgCAGCAAACCAGTTGGCGG	0.156	0.111	0.212	83
contig.1.cir	m6A	577369	194	-	605	TTGTGATTTTCCCTCTTGA	cAtgCAGCAACAACCCCTGTTG	0.091	0.057	0.135	58
contig.1.cir	m6A	552520	302	-	596	TACAGAACAAGGTTTAAAA	cAtgCAGCATACACTGCGACAA	0.39	0.322	0.461	181
contig.1.cir	m6A	446669	146	+	494	TTCAAGAATTTTGTAATAT	cAtgCAGTATATTAAAATTGAT	0.398	0.322	0.485	71
contig.1.cir	m6A	555461	123	-	579	ACCGTTGCTGTTTGTTATG	cAtgCAGTGTTTATAGCTCACA	0.047	0.021	0.08	98
contig.1.cir	m6A	83577	62	+	560	TTTTTATTTAAAAGAAATT	cAtgCAGTTCGTAACAAAATTA	0.07	0.04	0.103	44
contig.1.cir	m6A	537215	132	+	589	TCTTTGGTGATTCTATTAG	cAtgCATCAAAAATTTTGTCAC	0.114	0.074	0.153	279
contig.1.cir	m6A	57100	69	-	560	ATTCCACTAGCAACTAGAG	cAtgCATCAAACTTGAGGGACC	0.145	0.087	0.207	71
contig.1.cir	m6A	258026	32	+	405	TGCCACAGCTTATGTTATG	cAtgcAtgAAAATTTGCTTGAT	0.021	0.012	0.045	21
contig.1.cir	m6A	258031	54	-	391	TTTATATCAAGCAAATTTT	cAtgcAtgCATAACATAAGCTG	0.128	0.071	0.18	9
contig.1.cir	m6A	296777	59	-	443	ATTTACATCTAAATCAAAT	cAtgCATTAACACCTTTTTCAT	0.065	0.019	0.114	16
contig.1.cir	m6A	168812	92	-	415	ACAATGTATAATTGTTAAC	cAtgCATTACTTTAAAATAATA	0.241	0.163	0.309	76
contig.1.cir	m6A	291808	53	+	440	TTAAATGCAATTTTATTAC	cAtgCATTTATAGAGCATAAAT	0.185	0.124	0.253	73
contig.1.cir	m6A	686542	94	+	665	TGTAAAACGTGGCGAAATT	cAtgCATTTATTGGTGAAAATG	0.332	0.252	0.407	62
contig.1.cir	m6A	508407	140	+	529	AGAATTTCTAAAAATTTTT	cAtgCATTTCTTTAAATTGATC	0.175	0.122	0.233	35
contig.1.cir	m6A	533488	27	-	554	AAAGATTcAtgCTTCTGGT	cAtgCCACACGGAGTGAACACC	0.03	0.014	0.056	21
contig.1.cir	m6A	349387	133	+	429	TCGATATGTTTTAAAAAAT	cAtgCCCCAAGCCAACTCCTGT	0.229	0.169	0.289	23
contig.1.cir	m6A	459913	27	-	497	CGAGTCCCTTGCACTCCAC	cAtgCCGACTTAGCTCAATAGG	0.035	0.015	0.065	91
contig.1.cir	m6A	135408	26	+	529	TATCCCACAACGTTATTTA	cAtgCTCCAATTGGCGTAGCAA	0.095	0.054	0.143	36
contig.1.cir	m6A	574143	51	+	603	AATATCAGCAGCAATAAAC	cAtgCTTTAATCAGGCGTCGAA	0.04	0.015	0.07	75
contig.1.cir	m6A	482648	137	-	516	AATTGTTTTTAGTGGTCAT	cAtgGAACAACAACAAAGGACA	0.46	0.383	0.537	187
contig.1.cir	m6A	102774	184	+	531	AAAACAAACAAAAATGTTT	cAtgGAACAGTAAATGCAAATA	0.578	0.507	0.643	236
contig.1.cir	m6A	96506	86	+	522	AGAAAGGTAAGTAAATAAT	cAtgGAATTAACAAGAGTTATT	0.263	0.2	0.329	24
contig.1.cir	m6A	583756	178	-	597	AAAAGAATTCTATGCAAAA	cAtgGAATTAAGATTCCACAAT	0.412	0.35	0.477	56
contig.1.cir	m6A	42192	73	-	579	AAATTATTATTCATTAATC	cAtgGATTAATGAAATTAATGA	0.128	0.081	0.184	4
contig.1.cir	m6A	632071	58	+	657	ATCTGAAGGCTATGATTAT	cAtgGATTATATGGTAGTTATA	0.144	0.102	0.188	41
contig.1.cir	m6A	358389	40	+	425	TGTTAAAACACTTATTAAT	cAtgGATTTATTGATCCTAAAA	0.127	0.073	0.17	23
contig.1.cir	m6A	83680	23	+	555	ATTATTAATCATTTTAATC	cAtgGATTTTTTTACCAATTAG	0.049	0.02	0.087	31
contig.1.cir	m6A	608472	21	+	635	AATAGTTCAGCGATTGTTT	cAtgGCGCGGTTCTAAATCTTA	0.037	0.023	0.057	5
contig.1.cir	m6A	174906	85	-	450	TTATAAGAGTGGGTTTTTG	cAtgTAAAAATAAGCCGTGTTC	0.109	0.065	0.167	224
contig.1.cir	m6A	600157	82	-	597	ATTTTTACAACATTAAGTT	cAtgTAAAAATCTTCAACAACA	0.073	0.037	0.114	54
contig.1.cir	m6A	195310	36	-	450	TAAAACCATTAATGCCATT	cAtgTAAAAGAAATAACCATAT	0.051	0.018	0.087	17
contig.1.cir	m6A	557972	24	+	554	AATTGGTAATCATTTGAAT	cAtgTAAAATAATTAATTTCGA	0.031	0.015	0.057	33
contig.1.cir	m6A	658950	138	+	662	TGAATAGCTTGATTAATAT	cAtgTAAAATTGCAATAATTGT	0.172	0.113	0.232	4
contig.1.cir	m6A	729454	28	-	389	AATTCGATTAATTCACCAA	cAtgTAAATATAAATTCTTTTT	0.119	0.057	0.189	35
contig.1.cir	m6A	26009	82	+	590	TTCAAATCTTTTGGAAAAT	cAtgTAAATCAAATATCATTTT	0.138	0.088	0.193	69
contig.1.cir	m6A	408437	178	-	484	AACTCTGGATTTAATGAAG	cAtgTAACAAAAAAACAATTAC	0.384	0.314	0.447	125
contig.1.cir	m6A	316975	98	+	408	TAAATTGCCAATAAATCAC	cAtgTAACAATTGTTCATTCAT	0.504	0.407	0.592	97
contig.1.cir	m6A	641088	125	-	662	TATTTTTTTCTCTTTTGCG	cAtgTAACTAAAAAAGGAATTA	0.476	0.415	0.541	242
contig.1.cir	m6A	45583	71	-	601	TCTTCAACATCTTTATTTT	cAtgTAATAATGCATCAATTTC	0.421	0.336	0.495	40
contig.1.cir	m6A	333566	30	+	440	TTCCCTGTTCCTGATAATC	cAtgTAATAATGTATGATCAAA	0.217	0.139	0.282	32
contig.1.cir	m6A	193428	187	-	455	TTTTTGTTATATTTTTTTT	cAtgTAATAATTTAATTAAGTA	0.681	0.575	0.782	132
contig.1.cir	m6A	207354	83	+	451	TAATTGTGAAAATGAATAT	cAtgTAATAGAAGATGTAATTG	0.43	0.332	0.528	26
contig.1.cir	m6A	525865	33	+	594	AATAATGATGGTTTTAAAG	cAtgTAATCACACAAAACGGTT	0.08	0.047	0.115	46
contig.1.cir	m6A	338995	104	+	493	GAGTTCCACCCTCAAATTT	cAtgTAATTATCATAGAGCTGA	0.357	0.269	0.442	38
contig.1.cir	m6A	337606	47	+	462	TTTTCACTTGCAAAAATAG	cAtgTAATTCTTGTCAATGAAA	0.194	0.119	0.272	40
contig.1.cir	m6A	589314	121	-	580	TTATCAATTAGGATTATCA	cAtgTACCAGAAGATCGTCATA	0.414	0.341	0.483	49
contig.1.cir	m6A	6229	181	+	545	AACCTTCCCTAGAACATTT	cAtgTACCATCTTGAATTAAAC	0.815	0.738	0.898	284
contig.1.cir	m6A	616164	177	-	579	TTGATTAGTCTTAGTTTTT	cAtgTACCATTTTTTGATGATC	0.839	0.735	0.933	123
contig.1.cir	m6A	616121	65	-	574	ACAAATTCAACATATCCAT	cAtgTACTAATTTAGCTAGATC	0.44	0.355	0.533	40
contig.1.cir	m6A	479936	175	+	502	AGCGTTTAATTGAAAAGTA	cAtgTACTATAACCTAATTGTT	1	0.888	1	38
contig.1.cir	m6A	281787	313	-	423	ATTATTTACAATACTAACA	cAtgTACTATTAATACTcAtgA	1	0.924	1	163
contig.1.cir	m6A	484157	366	+	525	GCATTAGTATTTGGTAATT	cAtgTACTTGTAAACCTACACC	1	0.927	1	283
contig.1.cir	m6A	112325	174	+	506	ATTTCAATCCTTATCACCT	cAtgTAGCACATCAAATTTAAA	0.34	0.278	0.42	61
contig.1.cir	m6A	346670	318	+	418	GCAGCTTTTAGAACATTTT	cAtgTAGCATTCCAGTTCCCAT	0.688	0.606	0.772	188
contig.1.cir	m6A	563042	182	+	551	GAGCTCACGTAAATGTCCA	cAtgTAGCTATTACATTATAAC	0.377	0.3	0.455	46
contig.1.cir	m6A	306386	46	-	402	ATTTTGCCATACGATGATT	cAtgTAGCTTGTTTGCACCTAA	0.065	0.027	0.11	4
contig.1.cir	m6A	344656	165	+	435	TTTAATTTTGTTAATAAAG	cAtgTAGTAAAGCTTTTGTTGT	0.511	0.424	0.591	189
contig.1.cir	m6A	83740	287	+	551	ATTTTCTTTTTAGCTTTAT	cAtgTAGTAATTTTATAAATTT	0.736	0.646	0.814	211
contig.1.cir	m6A	619862	109	+	609	GTCGCGATcAtgGCTACAG	cAtgTAGTACAACAAAAAAGGA	0.386	0.313	0.453	320
contig.1.cir	m6A	501310	255	-	516	AAATTGTTTTTAACTAAAT	cAtgTAGTATTAATGATTTGCG	0.906	0.805	0.984	136
contig.1.cir	m6A	520514	397	+	585	TAGTGAATTCATCCTTAAA	cAtgTAGTATTTAATTTTTTGT	0.965	0.878	1	317
contig.1.cir	m6A	91756	20	+	501	GTTCCTATAGCATTGGTTG	cAtgTAGTCAAAATAAAACAAA	0.061	0.025	0.106	7
contig.1.cir	m6A	662325	139	+	664	ATTGCCACTAAAGCTTCAT	cAtgTAGTTCCATATTGTTTAA	0.401	0.328	0.479	86
contig.1.cir	m6A	291955	46	-	416	CACAAACAAACCATCAATG	cAtgTAGTTGAAGTTATTAGTG	0.145	0.09	0.21	17
contig.1.cir	m6A	66274	147	-	565	CAAGCTGTTTCAAAAAAAC	cAtgTAGTTTAGGTTCATAAAT	0.178	0.128	0.241	20
contig.1.cir	m6A	60764	107	+	553	ACAAAGTGTTGAAAAAAGT	cAtgTAGTTTATGATAAGTGAA	0.114	0.07	0.157	25
contig.1.cir	m6A	407283	69	-	458	ATTATTAGCACCATTTCTG	cAtgTAGTTTTAATCAAATTAA	0.222	0.162	0.291	62
contig.1.cir	m6A	291028	53	+	429	CTGACAACGTAGTTTTTAT	cAtgTATTAAGTGAAAATAATA	0.347	0.251	0.454	23
contig.1.cir	m6A	429134	160	-	484	TAATAATAGTGATGATAAT	cAtgTATTAATTGATTCACAAA	0.662	0.563	0.764	134
contig.1.cir	m6A	716943	39	-	566	AAAGGCTTCGTTCGATTTG	cAtgTATTAGGcAtgCCGCCAG	0.263	0.189	0.339	9
contig.1.cir	m6A	565041	102	-	622	TTAGATTTTACAATTTTAA	cAtgTATTAGTTTTTTAATGTT	0.508	0.42	0.591	18
contig.1.cir	m6A	702745	61	-	649	GAAACAAACTTGTAAAATT	cAtgTATTTACTTTTTTCTTTT	0.371	0.292	0.442	14
contig.1.cir	m6A	278481	33	-	430	ATTTATCATAATTAATATT	cAtgTATTTGGCTACTTGATTA	0.231	0.152	0.324	4
contig.1.cir	m6A	288008	20	+	434	AGATAAAGGTGTTTATGAG	cAtgTCCCAGAATTCTATAGTT	0.397	0.322	0.466	325
contig.1.cir	m6A	86679	39	-	557	AACGTTGTTTGAATGTTTG	cAtgTCCCATTTGTAACATTAC	0.194	0.145	0.244	171
contig.1.cir	m6A	534330	33	+	592	TAGATAGTCTTAATTTTAA	cAtgTCGCAAAATGTGAGGAAT	0.118	0.082	0.162	27
contig.1.cir	m6A	631057	107	+	656	GTATTTTGGCACAAATTTA	cAtgTCGCAGAAGCGTTAAAAT	0.378	0.312	0.437	252
contig.1.cir	m6A	151014	85	-	473	GTAATTTTATCAACTAAAA	cAtgTGATAATTGTTCTAATTG	0.168	0.12	0.218	20
contig.1.cir	m6A	713567	49	-	574	AAAAGATAATTATTAAAAA	cAtgTGATTCAATTTTAATATT	0.09	0.05	0.125	34
contig.1.cir	m6A	687357	57	+	660	GCTGTAGTTTCATTAAGTG	cAtgTGCTAACACAAATAATAA	0.137	0.1	0.175	258
contig.1.cir	m6A	473701	67	+	522	TTTGAAGCATCAATAATTT	cAtgTGCTAATTTCTCAATCAT	0.127	0.079	0.178	22
contig.1.cir	m6A	297037	28	-	429	TCACCATCTAGAACCATTC	cAtgTGCTACTAAATATTTATA	0.044	0.015	0.077	91
contig.1.cir	m6A	12649	20	+	574	ACTTTAGAAGCTAATAAAG	cAtgTGCTTCTTTGTGTGAGTT	0.044	0.023	0.075	96
contig.1.cir	m6A	163612	104	+	455	GTAGGGAGTTGGGGAACTC	cAtgTGGAGCGGTAAAATGCGT	0.248	0.18	0.306	231
contig.1.cir	m6A	717565	160	+	582	GTAGGGAGTTGGGGAACTC	cAtgTGGAGCGGTAAAATGCGT	0.318	0.257	0.376	332
contig.1.cir	m6A	283988	68	-	389	ATTAGGAATGATAGCGCCT	cAtgTGGCACGAATATTAAATC	0.297	0.221	0.376	10
contig.1.cir	m6A	130625	282	-	520	TTGTTTTGTTGAATTAAAG	cAtgTGGCATTGAGCCAATTAC	0.578	0.508	0.651	295
contig.1.cir	m6A	570330	32	+	594	GCAACAAAGTTTGTAATAG	cAtgTGGCCAATAACCATCTTT	0.061	0.033	0.091	226
contig.1.cir	m6A	315265	103	+	407	TCGTATTGATAAGCAGACC	cAtgTGGCGATCAACCAGGGCC	0.331	0.266	0.395	31
contig.1.cir	m6A	605605	50	-	599	ACAAAAACCTTTAAAAGGC	cAtgTGGTTTTAGGATTTGATC	0.04	0.018	0.065	135
contig.1.cir	m6A	514777	22	+	551	CCGAATTTTTCAATTCCAC	cAtgTGTTTCAATAAAACGACG	0.017	0.012	0.032	99
contig.1.cir	m6A	371919	34	-	415	GCAACAACCGTTGAATTTT	cAtgTTCTGCTAATAATACCTT	0.095	0.048	0.148	13
contig.1.cir	m6A	494836	25	+	527	TTTTTATAGTGTGAATTTA	cAtgTTGATTTTAACACACTAT	0.031	0.015	0.056	10
contig.1.cir	m6A	192956	25	+	458	TGATTATTTTTTTAATAAT	cAtgTTGCTATTATTATTACAA	0.018	0	0.044	25
contig.1.cir	m6A	318035	26	+	412	ACGCATAATTACAGGTTCG	cAtgTTGGAATTGAAGCATTTG	0.048	0.018	0.085	39
contig.1.cir	m6A	670874	46	+	661	AAATCCTAGTTTGCTAGCT	cAtgTTTTAAAAAATTTTGATA	0.04	0.02	0.065	48
contig.1.cir	m6A	731568	107	-	270	TCATAAAAATcAtgAAAAG	CATTATAGACTTCACCACGAAC	0.261	0.173	0.342	81
contig.1.cir	m6A	299545	31	+	410	AAcAtgATGAAGATTATAA	CATTGAATATTTTAATAAAAAA	0.353	0.248	0.475	28
contig.1.cir	m6A	369071	30	+	406	ATCTCTAATGTTTTTTTAA	CATTTAACAcAtgACTTATATT	0.155	0.072	0.224	28
contig.1.cir	m6A	280316	37	+	448	TACTCATTAATTTTATTAT	CATTTACcAtgCACACACCTAT	0.779	0.693	0.88	163
contig.1.cir	m6A	132097	42	+	535	CTACcAtgGGCAAGAAATT	CATTTAGTTGCACAAACTTTAT	0.065	0.027	0.105	5
contig.1.cir	m6A	502003	20	+	529	TTAGTGCGcAtgTGTAATG	CATTTGCTAAAAAAAGTCCTTT	0.031	0.015	0.056	127
contig.1.cir	m6A	259663	51	-	380	TGGCATACCAAATGCTTCT	GAAAGGGcAtgTAATGAATAAT	0.506	0.419	0.595	282
contig.1.cir	m6A	66200	109	-	559	TATGAAAGCAACAcAtgTT	GAAATAGCAACAAGTAAAGACA	0.498	0.425	0.569	273
contig.1.cir	m6A	615536	45	+	632	AGTATAAATTTTATTAAAA	GAAATAGTAAAAAcAtgTGAAG	0.258	0.202	0.32	34
contig.1.cir	m6A	540541	110	+	593	AATATCTTTAACGAATTAG	GAAATAGTAATAAAAAcAtgAT	0.519	0.441	0.59	135
contig.1.cir	m6A	729389	86	-	388	TGCATAAATAcAtgCAACA	GAAGCAACAACAATGACATCAT	0.245	0.184	0.324	60
contig.1.cir	m6A	134519	23	-	513	TAATGATGCTTTTAGTTTG	GAAGCAACACGTTCTTcAtgAC	0.192	0.148	0.245	7
contig.1.cir	m6A	245191	23	-	437	TAATGTATCAGCACcAtgC	GAAGCAATAATATCATCAGGAT	0.245	0.178	0.312	98
contig.1.cir	m6A	473685	97	+	515	TGCTGCTCCTACATTATTT	GAAGCATCAATAATTTcAtgTG	0.388	0.316	0.46	40
contig.1.cir	m6A	351548	65	+	444	ACGTAATTTTGGTAAAAGT	GAAGcAtgAATATTAACAATTT	0.21	0.153	0.269	55
contig.1.cir	m6A	166342	41	-	420	ACGCTAGAAGCTTTTCTTG	GAAGcAtgATGTATATGTCTTC	0.165	0.113	0.222	15
contig.1.cir	m6A	3439	82	+	433	TACTTATGAAATTGTTAAT	GAAGcAtgATTTAAACAATTTG	0.214	0.152	0.277	28
contig.1.cir	m6A	49515	34	+	561	TGAATTAAATcAtgAACGT	GAAGCATTAATTCAAGATTTTG	0.062	0.03	0.099	122
contig.1.cir	m6A	318047	56	+	411	AGGTTCGcAtgTTGGAATT	GAAGCATTTGGATCACCTGCTA	0.167	0.111	0.233	87
contig.1.cir	m6A	137090	20	-	531	ACTTTCATCCATATCTcAt	gAAGCTAAAATTCGTACAGTTG	0.17	0.104	0.237	57
contig.1.cir	m6A	503015	51	+	532	AATTCCAAcAtgATCAAGA	GAAGGAGCAAAGGGGTAAACGC	0.141	0.101	0.188	5
contig.1.cir	m6A	507188	41	-	546	AATTAAAATTCGAGCCTTT	GAAGGTAAGAATCAAAAAcAtg	0.249	0.183	0.307	169
contig.1.cir	m6A	386455	60	-	460	TCGTAAATATACACTAAAA	GAAGTAAGAATTATTAATcAtg	0.343	0.269	0.422	74
contig.1.cir	m6A	486237	57	+	524	TGAGGAcAtgTCATTGGAC	GAAGTACTAAGATTTCATTATC	0.762	0.675	0.847	160
contig.1.cir	m6A	236816	20	-	442	TAATAATGTTTATGAACAA	GAAGTGTCATTAAATcAtgAAA	0.28	0.21	0.344	29
contig.1.cir	m6A	694208	34	+	691	ATGCGAATCTcAtgATTTT	GAATCAAAAATTAAATTTGTAA	0.278	0.219	0.355	198
contig.1.cir	m6A	537206	23	-	560	TTTTTGATGcAtgCTAATA	GAATCACCAAAGACATTGATAA	0.182	0.12	0.253	22
contig.1.cir	m6A	335591	129	-	457	AAAAAcAtgATGAGAAACT	GAATCAGCAAACAAATCATCAA	0.384	0.319	0.455	223
contig.1.cir	m6A	63736	192	+	566	CAAAATcAtgGGATATAAT	GAATCAGTAAATAAAGTTGCTA	0.42	0.356	0.492	116
contig.1.cir	m6A	218803	173	+	458	TTTGATGCATCAGCAAATG	GAATGAGcAtgCAAATGGCTAA	0.816	0.74	0.888	124
contig.1.cir	m6A	241881	65	+	427	AAAATGCTAGTTTATCAAT	GAATGAGcAtgTTATTTTAAAA	0.636	0.543	0.736	43
contig.1.cir	m6A	119833	44	-	525	ACCTAAGCCAACTGCTAAT	GAATGTGcAtgTGCATTAGCAT	0.183	0.132	0.239	42
contig.1.cir	m6A	653033	165	+	677	AAGCGATGAACAAGCAATT	GAATTAGCAAAAAAACACcAtg	0.543	0.475	0.603	273
contig.1.cir	m6A	298137	54	+	433	TcAtgGCGGTGTTGTTCCT	GAATTAGCAAGTCGTTATcAtg	0.337	0.254	0.42	206
contig.1.cir	m6A	81090	123	+	584	AAAAGAAATGGAGCAATAT	GAATTAGCAGATAGTAcAtgAC	0.493	0.422	0.557	105
contig.1.cir	m6A	360818	91	+	426	AATCGACTTAGTTGATATG	GAATTAGCAGCTATTGCTcAtg	0.446	0.369	0.525	107
contig.1.cir	m6A	321002	50	+	417	TcAtgCCTATAAGTCAAAG	GAATTAGCTTTAAATTTAGCAT	0.149	0.089	0.215	92
contig.1.cir	m6A	296727	121	+	452	TAATGCAATTATGGATcAt	gAATTAGTAGAAAATATCATTA	0.533	0.44	0.611	268
contig.1.cir	m6A	631987	59	+	668	TCTACGTAATCAAAAAAAT	GAATTAGTGGGAATTTGGcAtg	0.463	0.39	0.55	4
contig.1.cir	m6A	666959	32	+	688	GCACCAATAATTGTcAtgG	GAATTGCTAAAAAAATATAATA	0.036	0.014	0.064	139
contig.1.cir	m6A	569820	302	+	606	CTAAATGTAGTTGCAATAC	GAATTGGcAtgTATAAATTAGC	0.814	0.751	0.875	594
contig.1.cir	m6A	19018	23	+	605	AGGCGATAACTTAAATAAT	GAATTTTTAGAAGAAATcAtgA	0.301	0.233	0.377	85
contig.1.cir	m6A	120906	20	+	478	ATTCCTTTATTATTCCTGG	GACAGACcAtgCAGGGATCGCA	0.615	0.47	0.63	23
contig.1.cir	m6A	486234	21	+	521	TGATGAGGAcAtgTCATTG	GACGAAGTACTAAGATTTCATT	0.051	0.024	0.085	51
contig.1.cir	m6A	512527	106	+	512	TATGCATCAAATAAATTAT	GACGCACTAATTcAtgACCAAT	0.324	0.255	0.392	124
contig.1.cir	m6A	566704	156	-	636	TcAtgTTCATAATAAAATT	GACGCATTATCTGATATTcAtg	0.304	0.247	0.361	105
contig.1.cir	m6A	641098	128	+	611	TTTAGTTAcAtgCGCAAAA	GAGAAAAAAATAAAGCAAGAAG	0.181	0.141	0.225	193
contig.1.cir	m6A	697671	20	-	693	GGGATTCTACAAAATTATT	GAGAAAAATTAAAGAcAtgGAT	0.447	0.387	0.462	65
contig.1.cir	m6A	600959	47	+	576	AAAAGAAATcAtgTTATAT	GAGAATGCAATTACAATCATAA	0.053	0.028	0.085	4
contig.1.cir	m6A	320083	26	-	447	cAtgTAATGGAAGGGGCAA	GAGATGGTAAGCTAGTTGCTGA	0.253	0.197	0.319	142
contig.1.cir	m6A	405448	114	-	462	CAATcAtgAAGCTATTTTT	GAGATTCCTATTACAGCATCCC	0.432	0.343	0.509	29
contig.1.cir	m6A	714123	64	+	609	TTAGAATTACCTGTTGATT	GAGATTTTAATAAAcAtgAAAA	0.349	0.277	0.403	106
contig.1.cir	m6A	541945	56	+	598	AGAATTTCAAAATGAAAAC	GAGCGATTATTGcAtgAATTTT	0.339	0.281	0.399	191
contig.1.cir	m6A	274968	42	-	462	ATTGATcAtgCAAATTTAG	GAGCTAAAAAATTATTTCTTTG	0.069	0.039	0.113	165
contig.1.cir	m6A	642707	24	-	670	AAAGAACGAATAGcAtgAG	GAGCTAATAGGATAGCTTGCGT	0.142	0.093	0.191	66
contig.1.cir	m6A	670872	52	-	671	TCAAAATTTTTTAAAAcAt	gAGCTAGCAAACTAGGATTTAA	0.091	0.054	0.136	41
contig.1.cir	m6A	413281	25	-	473	AAAAGTTTTAATATTTTTT	GAGCTATTACAATGAACAcAtg	0.27	0.239	0.3	53
contig.1.cir	m6A	563026	49	-	620	TAcAtgTGGACATTTACGT	GAGCTCGCAAAAAAATCTGGTT	0.201	0.152	0.244	109
contig.1.cir	m6A	671741	216	-	685	ACTTAAAGCATTAACAACA	GAGGCACCAACACcAtgTAATC	0.491	0.435	0.552	207
contig.1.cir	m6A	429253	173	-	484	GATAATATAACAAAAAcAt	gAGGCATTAAAATTcAtgCAAA	0.278	0.224	0.341	115
contig.1.cir	m6A	190353	30	-	442	ACGAAGTTTAGCAGcAtgT	GAGGGAGCAATTCTAGTTGTTG	0.316	0.241	0.39	151
contig.1.cir	m6A	696857	25	-	687	CAGGAGcAtgGATTTTAAA	GAGGGATTAAATTTAATTATTG	0.235	0.207	0.265	193
contig.1.cir	m6A	99429	45	+	502	GTTCTAAAAGCTGGTGCTA	GAGGTATTAAAACAcAtgTTTC	0.482	0.385	0.568	236
contig.1.cir	m6A	130234	108	+	529	cAtgGTGTGTGGAACAAGT	GAGGTTTTAGCATTATTAGAGT	0.424	0.357	0.49	200
contig.1.cir	m6A	654255	27	-	707	TTTTTAGGAGTAAATTcAt	gAGTAAAAAAATCAAAATTTAT	0.43	0.415	0.445	130
contig.1.cir	m6A	534378	28	+	589	ATATGGTCTTcAtgACcAt	gAGTAACTACTAATGAATGAAT	0.115	0.075	0.15	28
contig.1.cir	m6A	337906	95	-	433	GTCGAATTTAAAAAACACG	GAGTACGCAATCTTGCcAtgCC	0.408	0.336	0.484	178
contig.1.cir	m6A	515090	35	-	574	TAAGGATTTCAAATTTcAt	gAGTCAAAAACTTTAACAATTT	0.216	0.149	0.31	135
contig.1.cir	m6A	459931	37	-	490	AGCAAAGGGTCAGGGGTTC	GAGTCCCTTGCACTCCACcAtg	0.56	0.544	0.565	58
contig.1.cir	m6A	138422	54	+	521	TTTTAGAAGGCAAAATTAT	GAGTGAAGAGcAtgCTATTAAA	0.288	0.209	0.371	26
contig.1.cir	m6A	106962	37	+	539	TATTTGTATTTCAGTGAAT	GAGTGCGTTATTcAtgGAGTCC	0.253	0.214	0.3	93
contig.1.cir	m6A	12666	29	+	580	AGcAtgTGCTTCTTTGTGT	GAGTTAAAATATTCTAAATATT	0.286	0.256	0.315	54
contig.1.cir	m6A	624780	24	-	592	cAtgAAGCAATAATAATAG	GAGTTAAGATTGTAATTGGTAA	0.098	0.061	0.143	139
contig.1.cir	m6A	259638	27	+	436	GCAAGTTATGGTATTTTAG	GAGTTAATTATTCATTAcAtgC	0.233	0.142	0.317	137
contig.1.cir	m6A	709413	83	-	569	AAAGCCTCTTCTTGATcAt	gAGTTACTAAAATAAAGGTGAT	0.34	0.28	0.404	102
contig.1.cir	m6A	593857	20	-	595	AATTGCTGAATTTAGGcAt	gAGTTATTTATGATAATTGGGC	0.266	0.226	0.312	81
contig.1.cir	m6A	81402	27	-	519	GGCACTcAtgTTAATTcAt	gAGTTGAGAAATAAATATCTTT	0.11	0.063	0.164	93
contig.1.cir	m6A	639461	21	-	651	AAGAAAGTATTGCCATcAt	gAGTTGTTAATAAGTGATTTAA	0.339	0.237	0.388	104
contig.1.cir	m6A	198362	44	+	474	AAGTTAGTAACAACTTcAt	gAGTTGTTATTTTTTTATTTTT	0.234	0.148	0.331	73
contig.1.cir	m6A	515590	56	-	566	AGTGAAGATGATCCAAcAt	gAGTTTTTTATAACAATTCAAA	0.134	0.088	0.18	35
contig.1.cir	m6A	428606	97	-	479	TACATTCcAtgATGAAAAA	GATAAAACAACTCATAATGTTA	0.398	0.316	0.489	171
contig.1.cir	m6A	450928	40	-	511	TTcAtgTATCACAAAAAAT	GATAAACTAAAAACCACTATTT	0.476	0.363	0.534	33
contig.1.cir	m6A	98851	21	+	491	TGCTTACTATGAAGGAAAA	GATAAAGCAcAtgCACTTGTAA	0.034	0.015	0.065	47
contig.1.cir	m6A	117716	23	-	511	TAAAGCTTGACAGCACcAt	gATAAAGTAGTAAGTATGACTG	0.226	0.103	0.302	29
contig.1.cir	m6A	443410	23	+	485	TAAATACTTTTTAGCATTT	GATAAGGcAtgACTAATAATCA	0.087	0.04	0.137	58
contig.1.cir	m6A	401350	61	-	454	TTTAAAATTAGTGTAcAtg	GATAATGCAAATAATAGCATTG	0.156	0.071	0.235	13
contig.1.cir	m6A	283998	21	-	391	TTTTAACACTATTAGGAAT	GATAGCGCCTcAtgTGGCACGA	0.188	0.073	0.3	31
contig.1.cir	m6A	113039	78	-	548	TGAAATAAATTATCATCAG	GATATAAcAtgAAAATTTGTCT	0.994	0.992	0.995	58
contig.1.cir	m6A	678470	21	+	683	AAAAGCTGCATTTTTTcAt	gATATAGGAAAAACGATTGATT	0.262	0.179	0.34	6
contig.1.cir	m6A	74426	42	-	545	TTTTGATGAGcAtgGCAAA	GATATAGTATGCGCTGGAGTGA	0.976	0.857	0.994	3
contig.1.cir	m6A	645767	66	+	618	TCGcAtgTGTATAAcAtgT	GATATGGTAATTGACAAAGATG	0.602	0.496	0.702	46
contig.1.cir	m6A	515600	70	-	580	ACCAACAGTTAGTGAAGAT	GATCCAAcAtgAGTTTTTTATA	0.733	0.659	0.807	309
contig.1.cir	m6A	691040	20	-	703	TTCTCAAATAAATTGCcAt	gATGAAAAATATAAACTCGATC	0.086	0.04	0.137	16
contig.1.cir	m6A	182913	278	+	461	TTCTGAAAcAtgAAAAAAA	GATGCACCAACTATTAATCTAA	0.771	0.686	0.842	272
contig.1.cir	m6A	591959	126	+	618	TTTATTACTATCATTAcAt	gATGCAGCAATAGCTGCAACTG	0.435	0.368	0.495	187
contig.1.cir	m6A	663	105	+	300	TGATGAATTAACTAATGTT	GATGcAtgTGGGGAAAAAGCGG	0.333	0.24	0.434	73
contig.1.cir	m6A	45570	108	+	559	TGAAAAAAACGATGAAATT	GATGCATTATTAcAtgAAAATA	0.447	0.378	0.524	124
contig.1.cir	m6A	278654	24	-	420	TAAGAcAtgAAAAAATGTC	GATGCATTTTTTGCGTGATCAA	0.17	0.102	0.239	66
contig.1.cir	m6A	274759	117	-	450	CATAATTGCAcAtgAAAAT	GATGCTTTAATCAAACTAGTAT	0.279	0.205	0.345	23
contig.1.cir	m6A	730642	86	+	389	TAAAGTAATTATGTATGCT	GATGTAATAACACAAGCcAtgC	0.591	0.491	0.692	93
contig.1.cir	m6A	53056	55	-	566	ACTAGAGcAtgAGGCAATT	GATGTAATAACACTTACACCAA	0.478	0.392	0.569	60
contig.1.cir	m6A	93351	44	-	598	ATCTATAAcAtgAATAAAT	GATGTAATAATCGAAATATTAA	0.429	0.35	0.513	59
contig.1.cir	m6A	487941	72	+	525	AATTGATGAACTAAAAAAT	GATGTAATTAACCATTTTcAtg	0.488	0.405	0.571	67
contig.1.cir	m6A	285952	20	+	435	ATTTTTCAAAGGTTcAtgT	GATGTAATTTCATAACCTGCAT	0.263	0.197	0.357	56
contig.1.cir	m6A	656897	48	+	689	GAATAAACAACAAATGATT	GATGTAGCAAAATATTcAtgCA	0.358	0.292	0.422	36
contig.1.cir	m6A	299174	108	+	423	TACCACGcAtgCATATGTT	GATGTAGTAAAAACCGCTTGAG	0.517	0.441	0.62	68
contig.1.cir	m6A	271910	25	+	464	GGAGAAAAAAGCTGCTTTA	GATGTATTAcAtgAAAGATTAG	0.181	0.111	0.242	67
contig.1.cir	m6A	694210	49	-	678	TTTTACAAATTTAATTTTT	GATTCAAAATcAtgAGATTCGC	0.293	0.215	0.385	184
contig.1.cir	m6A	49190	126	-	544	TCGTTCACGACGTACAATT	GATTCAGTAATTTCAAcAtgAC	0.397	0.315	0.476	143
contig.1.cir	m6A	547740	29	-	568	GcAtgCTTAGGATTATTAT	GATTGAACAATGAATTTTGTGC	0.482	0.39	0.574	43
contig.1.cir	m6A	532619	34	-	521	CATTAGAAAATACTTTAAA	GATTGTGCATTTAATTcAtgAT	0.092	0.042	0.147	18
contig.1.cir	m6A	68610	58	-	545	AAGCAAACAACAAAAAcAt	gATTTAACAGTTAAATTTGGTG	0.482	0.399	0.569	42
contig.1.cir	m6A	512467	38	+	510	TAAACTTCTAAATCTTTAG	GATTTAAcAtgTTAATTAATTC	0.083	0.026	0.136	63
contig.1.cir	m6A	512459	35	-	578	TAAcAtgTTAAATCCTAAA	GATTTAGAAGTTTATTTATCAC	0.196	0.113	0.268	60
contig.1.cir	m6A	697652	28	-	699	GAGAAAAATTAAAGAcAtg	GATTTAGCAAAATTAAGAAAAC	0.142	0.092	0.193	185
contig.1.cir	m6A	213238	65	+	481	AGATGATTATcAtgCAACC	GATTTAGCAGGCAAAGCAGCAG	0.376	0.297	0.45	13
contig.1.cir	m6A	130657	174	+	529	ACAAAACAATGGTCGGATT	GATTTAGcAtgTGAAATGTTTG	0.739	0.659	0.834	358
contig.1.cir	m6A	428942	63	-	489	CTATAACGATGGCGAAcAt	gATTTAGTATCTAATAACTTTG	0.358	0.268	0.451	55
contig.1.cir	m6A	33241	79	-	593	TTTCGGCGATGGTGAAAAT	GATTTGACAATGCTAAACcAtg	0.367	0.3	0.428	220
contig.1.cir	m6A	331757	33	-	468	TTAGGcAtgTTTAAGTATT	TAAAAAGTAATTTTCAATGCCC	0.292	0.194	0.384	68
contig.1.cir	m6A	582568	29	+	588	TTGTTACCGAGGTTTATAT	TAAACAAAAATGcAtgTTGCAA	0.053	0.021	0.083	23
contig.1.cir	m6A	626152	31	+	601	ATAATTTTGGTTTTCGAAG	TAAAGAAcAtgGCAAAAATCTT	0.092	0.058	0.131	6
contig.1.cir	m6A	642530	23	+	607	GATcAtgAATACGAGCAAT	TAAGAGAAAAAATACTGATTAA	0.028	0.015	0.044	117
contig.1.cir	m6A	163886	68	-	400	TCTACGTGTATTGTCAAAT	TAAGCAAcAtgCTCCACCACTT	0.238	0.179	0.302	23
contig.1.cir	m6A	717839	84	-	578	TCTACGTGTATTGTCAAAT	TAAGCAAcAtgCTCCACCACTT	0.253	0.201	0.304	40
contig.1.cir	m6A	370356	70	-	405	AAAATGAAATATTGTCGTT	TAAGcAtgTATCTGCAAACGAA	0.213	0.144	0.274	99
contig.1.cir	m6A	718073	31	-	589	ACGTTTGCAGCCCTAGATA	TAAGGGGcAtgATGATTTGACG	0.1	0.061	0.14	29
contig.1.cir	m6A	433851	101	-	452	AATTAAACcAtgAATTGAG	TAATCAGTATTTGACTGCGCAT	0.28	0.21	0.34	80
contig.1.cir	m6A	347501	20	-	405	TTcAtgGATGTTATTAATC	TAATTAAAAATTTAAAACAAAT	0.051	0.014	0.096	16
contig.1.cir	m6A	415580	24	+	480	TGGTAATTGATAAGAATGG	TAATTACcAtgATTTTTTTAAT	0.402	0.318	0.493	23
contig.1.cir	m6A	40260	21	+	587	TTATTAATAATAGTTATTA	TAcAtgATTAAAAAATGTTATT	0.053	0.025	0.095	178
contig.1.cir	m6A	582406	28	+	580	AAAAATGTTAATTcAtgAT	TACCTAATCAAAATTTTTTATT	0.178	0.127	0.229	36
contig.1.cir	m6A	594719	80	-	595	CGTTGTCAGCTTTTTTATT	TACCTACTAATcAtgATTTATA	0.48	0.403	0.559	87
contig.1.cir	m6A	469150	58	+	514	AAGTTTTTAGCAGATTCAA	TACTAAAcAtgTTTTTTTTATC	0.284	0.219	0.353	51
contig.1.cir	m6A	191511	21	-	447	GTCGTAAATATTTTTAACA	TACTAAGcAtgTTAGAAAAATT	0.082	0.04	0.13	14
contig.1.cir	m6A	632658	74	+	658	TCGAGCAACCATTAAAAAA	TACTTACcAtgATTCGTTTTAT	0.616	0.531	0.69	71
contig.1.cir	m6A	462813	68	+	522	AAAAAACATTAGAACTTAT	TACTTGGCAACTAACATTcAtg	0.276	0.216	0.347	68
contig.1.cir	m6A	479933	53	-	541	AATTAGGTTATAGTAcAtg	TACTTTTCAATTAAACGCTCTT	0.196	0.147	0.247	103
contig.1.cir	m6A	235492	20	-	444	cAtgTTATTAAGGCTGTTT	TAGAAAAAAATCAACAAGAATT	0.221	0.204	0.247	135
contig.1.cir	m6A	420715	27	-	494	AAATGAAcAtgATTAGCAT	TAGAAAAAACTGCTAAAGGAAA	0.02	0.015	0.036	264
contig.1.cir	m6A	86420	92	-	556	AACGATTATTAATAGATTC	TAGAAAAAATAATTcAtgAGCT	0.182	0.139	0.229	266
contig.1.cir	m6A	540568	46	-	594	AAATTTAATTGATGATTTT	TAGAAAAAATcAtgTTTTTATT	0.086	0.049	0.122	123
contig.1.cir	m6A	191499	54	-	449	TTTAACATACTAAGcAtgT	TAGAAAAATTTTTACTATTTTT	0.106	0.059	0.156	87
contig.1.cir	m6A	143730	22	-	504	AACAAATGCTcAtgATAAT	TAGAAATTTTTTGTTTAAAATA	0.171	0.16	0.191	65
contig.1.cir	m6A	480000	38	+	509	TAATCTAGCTTATGTTGTT	TAGATAAcAtgTTATTAACGTT	0.425	0.336	0.525	141
contig.1.cir	m6A	185839	22	+	452	cAtgGTAAAACAACACTTT	TAGATACTATTCGTAAATCATC	0.283	0.212	0.35	46
contig.1.cir	m6A	626971	90	-	585	TGAATCATATTTAGcAtgA	TAGATAGCAACCAATTCATTTT	0.329	0.268	0.399	17
contig.1.cir	m6A	680429	22	-	645	AAAGCATTTcAtgCTGATG	TAGATAGCATATGTGCTTCATC	0.179	0.125	0.229	10
contig.1.cir	m6A	377965	20	+	467	ATTAGTTATGATGGcAtgC	TAGATTTTTACGCAAAAcAtgG	0.069	0.034	0.111	31
contig.1.cir	m6A	375607	23	-	420	TATTTTAATACATCAAAAT	TAGCAAATAATcAtgATTATCG	0.036	0.015	0.065	46
contig.1.cir	m6A	252552	49	-	387	GGAGCTGGAATAGTTGCTA	TAGCAGCTTcAtgTTCTAATTC	0	0	0	56
contig.1.cir	m6A	613095	23	-	596	ATAcAtgTAATCATTGAAA	TAGCCAAAAATACCATTGTTCT	0.015	0	0.015	4
contig.1.cir	m6A	460120	26	-	509	GTAGGTTCGATCCCTACTG	TAGCCGCcAtgGCCTGTTGGTG	0.015	0	0.023	47
contig.1.cir	m6A	694655	38	-	673	TTGAAATCGATATTGAATT	TAGCGAAcAtgATAATCTAATT	0.23	0.177	0.28	109
contig.1.cir	m6A	689674	30	+	660	CTTTAATTTTTAAAGACCG	TAGCGATcAtgATAAATATAAA	0.288	0.224	0.349	205
contig.1.cir	m6A	586	20	+	306	CGTcAtgTTGGACCAAATT	TAGCTAAAAAAATAGCTAAACA	0.028	0	0.06	36
contig.1.cir	m6A	271929	24	+	466	GATGTATTAcAtgAAAGAT	TAGCTAAAATTAATTTTTTCAC	0.031	0	0.065	142
contig.1.cir	m6A	413278	30	+	474	AAGcAtgTGTTCATTGTAA	TAGCTCAAAAAATATTAAAACT	0.015	0	0.02	88
contig.1.cir	m6A	656407	114	+	690	AAGTTAATTGCTAAAAAAA	TAGGAAAAAAATcAtgTTGAGT	0.168	0.133	0.212	274
contig.1.cir	m6A	104239	24	+	543	CGTGGTcAtgGTTCTGGTT	TAGGAAAAACTTCTGGGCGTGG	0.047	0.019	0.069	142
contig.1.cir	m6A	348006	46	-	400	TTATTTTTAAATTATAAAT	TAGGAAATAAAcAtgAATAATA	0.088	0.047	0.132	39
contig.1.cir	m6A	274971	25	-	454	ATGATTGATcAtgCAAATT	TAGGAGCTAAAAAATTATTTCT	0.028	0.015	0.052	79
contig.1.cir	m6A	670860	44	-	665	AAAAcAtgAGCTAGCAAAC	TAGGATTTAAAATAAACTCAGC	0.082	0.051	0.113	79
contig.1.cir	m6A	455980	54	-	501	AACTAAGAAAGATTTTTAT	TAGGCAATAATcAtgAGTTTGT	0.194	0.137	0.248	35
contig.1.cir	m6A	132078	26	-	521	ATGAATTTCTTGCCcAtgG	TAGGCATCTGCTGGTAATTGAA	0.087	0.055	0.123	31
contig.1.cir	m6A	230133	223	-	431	TTTTTACCAAATAACCAAT	TAGGcAtgAATAAAGCTGGTGT	0.384	0.323	0.452	219
contig.1.cir	m6A	320989	76	-	457	AGCTAATTCCTTTGACTTA	TAGGcAtgAATTTTTTTATAAT	0.141	0.098	0.189	109
contig.1.cir	m6A	593864	263	-	589	CGCAATCAATTGCTGAATT	TAGGcAtgAGTTATTTATGATA	0.286	0.24	0.339	320
contig.1.cir	m6A	666803	58	+	676	ATATCTCGAATGTGATATT	TAGGcAtgCGCAAAATAAGAGG	0.031	0.015	0.048	33
contig.1.cir	m6A	474511	241	+	525	CGAATCAATTGCGCAATTG	TAGGcAtgTAAATTTCCTTTCA	0.37	0.315	0.434	279
contig.1.cir	m6A	47524	104	-	565	TTTGCAGTATCAGAGACAT	TAGGcAtgTCACGAGTGATTTC	0.207	0.158	0.26	142
contig.1.cir	m6A	120831	39	-	504	ATCAGATAAGGTAAAATCA	TAGGcAtgTCCAATATGTAAAT	0.103	0.068	0.144	118
contig.1.cir	m6A	331775	29	-	473	ATTTATCAAAATGAAATGT	TAGGcAtgTTTAAGTATTTAAA	0.105	0.065	0.148	118
contig.1.cir	m6A	592289	41	-	600	GCATTTATTGCCAACTTAT	TAGGCATTACAcAtgAAAAAAT	0.088	0.055	0.126	81
contig.1.cir	m6A	420465	51	-	483	TAAAACAAAGCGTTTCAGC	TAGGGCAcAtgTTGAAATTAAA	0.193	0.138	0.25	68
contig.1.cir	m6A	718330	25	+	580	CCTTTTGGAGGcAtgCGTC	TAGGGTAGGATCGGTGACTGGA	0.095	0.063	0.124	27
contig.1.cir	m6A	552681	58	-	589	GTTTTAGTGTTAGCTAATT	TAGGTGCTAACAAGcAtgATTT	0.295	0.231	0.348	40
contig.1.cir	m6A	286720	225	-	411	CAACGAAAAGGATTGAATC	TAGGTGGcAtgAATGAGAGAAT	0.826	0.759	0.897	449
contig.1.cir	m6A	596481	57	+	629	AAATCTTTTTTGTTATTAA	TAGGTGTTAAACcAtgTGCAGG	0.19	0.144	0.246	210
contig.1.cir	m6A	161278	32	+	468	GTTCAAAAAGcAtgTGAAT	TAGGTGTTAATAGTATTTATCA	0.263	0.187	0.335	82
contig.1.cir	m6A	214603	61	-	448	TcAtgAACTAATAATAAAT	TAGGTTGCAATAAGATATTAAT	0.202	0.143	0.259	97
contig.1.cir	m6A	484706	57	-	537	cAtgAAATGTTAAAAAAAT	TAGTAAAAAATACTACTCCTTT	0.132	0.087	0.174	156
contig.1.cir	m6A	234421	30	+	455	TTcAtgATGAGGTTAAGCT	TAGTAAAAATAAAATAAAGCAA	0.098	0.065	0.145	28
contig.1.cir	m6A	191485	74	+	463	AAATTATATAATATAAAAA	TAGTAAAAATTTTTCTAAcAtg	0.158	0.105	0.211	75
contig.1.cir	m6A	90808	21	-	542	TCTTTTTGTGCTTCACTCT	TAGTAGAAcAtgAAGCAACAAC	0.065	0.04	0.095	26
contig.1.cir	m6A	430894	27	+	472	TTAACATCAAAATTAATTG	TAGTAGcAtgTGGAGTTGTGCC	0.081	0.052	0.114	119
contig.1.cir	m6A	104138	31	+	533	CAAAAGTTTAAGAGAAATA	TAGTGATTAGGAGTTTGTcAtg	0.124	0.075	0.177	18
contig.1.cir	m6A	401361	83	-	448	AAAAATAAATATTTAAAAT	TAGTGTAcAtgGATAATGCAAA	0.202	0.147	0.261	82
contig.1.cir	m6A	423741	26	-	476	AAATTACTAATAATAAAGC	TAGTGTGGAGATTGGTcAtgAC	0.078	0.045	0.117	10
contig.1.cir	m6A	562659	30	-	602	GGTTATAAACTTTCTGGAT	TAGTTAAAAAAAACTTAcAtgG	0.089	0.057	0.129	182
contig.1.cir	m6A	235519	55	-	440	CAAGATATTGTTGAAGATT	TAGTTAAAcAtgTTATTAAGGC	0.136	0.088	0.185	125
contig.1.cir	m6A	423046	48	-	491	TTTGAAACTCAACCATTAT	TAGTTAGCACAAATACAcAtgA	0.137	0.095	0.187	84
contig.1.cir	m6A	387408	142	-	457	CAAAGTGGACCAACACAAT	TAGTTAGCATTACATCTcAtgA	0.389	0.313	0.47	149
contig.1.cir	m6A	658671	31	+	656	TTCATATATTATTTCCTTT	TAGTTATCAAATAAATcAtgAG	0.091	0.057	0.134	9
contig.1.cir	m6A	562850	34	-	620	ATCGTGAAGGTGAAGCTAT	TAGTTGAcAtgTTTATGATTTA	0.124	0.084	0.167	94
contig.1.cir	m6A	151020	50	+	519	GAACAATTATCAcAtgTTT	TAGTTGATAAAATTACCGCAGT	0.114	0.077	0.16	69
contig.1.cir	m6A	449174	40	-	534	AAAAATATACATAATTTAG	TAGTTGATCAAAAATATcAtgA	0.163	0.128	0.195	44
contig.1.cir	m6A	648380	42	-	667	ATTCCTAAAACTAATAAAT	TAGTTGATTGcAtgATTGATAA	0.116	0.087	0.158	51
contig.1.cir	m6A	427069	33	+	448	TCAAGACCAGCAATTAAAT	TAGTTGCcAtgCATCTTATATA	0.14	0.091	0.192	47
contig.1.cir	m6A	252561	20	-	391	ACCTTAGTTGGAGCTGGAA	TAGTTGCTATAGCAGCTTcAtg	0.015	0	0.018	63
contig.1.cir	m6A	373351	27	-	437	CAAGCTTTTcAtgATGGTT	TAGTTGTTAATTTAGAATTAAT	0.095	0.055	0.142	49
contig.1.cir	m6A	95671	41	-	606	TCTAATACTAGTAAGTTTT	TAGTTGTTACTAATTcAtgTCC	0.112	0.075	0.149	47
contig.1.cir	m6A	137012	49	-	530	TGTTTGATCACcAtgATAA	TAGTTTGCAAAATCAAATGATT	0.079	0.05	0.118	10
contig.1.cir	m6A	548842	30	+	556	ATGATTAAAAAAATAATAC	TAGTTTGCGAAATGTGcAtgAG	0.08	0.05	0.115	8
contig.1.cir	m6A	670861	51	+	666	CTGAGTTTATTTTAAATCC	TAGTTTGCTAGCTcAtgTTTTA	0.088	0.054	0.119	71
contig.1.cir	m6A	144111	26	-	501	TCTAAACCTTCATTCGATA	TAGTTTTTAAAATATTTTcAtg	0.074	0.042	0.113	47
contig.1.cir	m6A	150979	22	+	514	TTAAAATTcAtgATTCAAG	TAGTTTTTTAAGAATTCAATTA	0.078	0.047	0.115	81
contig.1.cir	m6A	669880	22	+	674	AcAtgGAAGTTTTTATTTC	TATAAAAAAATTAATTGAAGCA	0.049	0.024	0.075	49
contig.1.cir	m6A	320972	37	+	421	TGATTGACATATTCAAAAT	TATAAAAAAATTcAtgCCTATA	0.085	0.042	0.14	28
contig.1.cir	m6A	114568	84	+	500	CTAAGATTGAATTTATTTT	TATAAAAcAtgATTATTAATAA	0.433	0.353	0.525	80
contig.1.cir	m6A	288024	29	-	413	TCCATTAAATCAATAAAAC	TATAGAATTCTGGGAcAtgCTC	0.157	0.097	0.225	4
contig.1.cir	m6A	731565	27	-	279	TAAAAATcAtgAAAAGCAT	TATAGACTTCACCACGAACTTC	0.168	0.081	0.258	25
contig.1.cir	m6A	252554	25	-	386	TTGGAGCTGGAATAGTTGC	TATAGCAGCTTcAtgTTCTAAT	0.015	0	0.028	68
contig.1.cir	m6A	290360	36	-	428	GGAGTTTTTATGGATCAAG	TATATAACATTGTcAtgGCTTA	0.497	0.404	0.601	34
contig.1.cir	m6A	33215	94	+	605	ATTTTTcAtgGCAAAGCCA	TATCCAGcAtgGTTTAGCATTG	0.416	0.339	0.498	46
contig.1.cir	m6A	105563	56	-	578	TAATAACCcAtgCTTTGTT	TATCTAAAAATTCAGCAACTTG	0.225	0.179	0.265	68
contig.1.cir	m6A	542699	23	-	608	TAATCATCCACGTAATTTT	TATGAAAcAtgATGTTATTCAC	0.081	0.049	0.122	22
contig.1.cir	m6A	536497	40	-	548	TTGAAAAGATTGGTAAAAT	TATGAAAcAtgTTTCAACATTA	0.118	0.071	0.169	17
contig.1.cir	m6A	149328	26	-	475	AGATCATATGATTCAGAAC	TATGAATTAAGTcAtgAACAAC	0.231	0.202	0.263	11
contig.1.cir	m6A	569366	124	-	675	TTTTTCCCATACTTTTGAA	TATGCAACAAATTATAATcAtg	0.12	0.08	0.162	8
contig.1.cir	m6A	245537	62	+	416	TTTAATTTTACTTTcAtgC	TATGCACCACATTTAGCGGAGG	0.213	0.141	0.285	53
contig.1.cir	m6A	291538	90	+	428	AATTCACATAAAGTATTTT	TATGcAtgAAAAGGATTTATGT	0.151	0.103	0.211	4
contig.1.cir	m6A	612743	45	+	642	AAAATAATTCCAATAATAA	TATGcAtgTATTGCTATGATGA	0.119	0.074	0.17	15
contig.1.cir	m6A	525440	69	+	598	ACGAGGACGCCCTCCcAtg	TATGCATTATCTCTAAACTCAA	0.251	0.195	0.316	77
contig.1.cir	m6A	552512	28	+	546	CATAGCAATTGTCGCAGTG	TATGCTGcAtgTTTTAAACCTT	0.044	0.019	0.069	21
contig.1.cir	m6A	490444	106	-	544	TTTTTGTTATTACCCATAC	TATGGAAcAtgTGCTTGAAGTT	0.403	0.338	0.464	198
contig.1.cir	m6A	296717	67	+	445	ATGAGAATCATAATGCAAT	TATGGATcAtgAATTAGTAGAA	0.25	0.178	0.324	20
contig.1.cir	m6A	185804	22	+	454	GTGCTCCAATTGTAACAAT	TATGGGTcAtgTTGATcAtgGT	0.104	0.058	0.151	7
contig.1.cir	m6A	567678	28	+	592	AGCTTTTATACATCCTTCA	TATGTACcAtgATCTAAATGCA	0.446	0.377	0.526	38
contig.1.cir	m6A	17463	110	-	623	AcAtgTTAAATTAGCACCT	TATGTACTATTTACATTTTGTT	0.685	0.58	0.778	97
contig.1.cir	m6A	183989	48	-	454	cAtgTTTCTAAATCTTCAT	TATGTACTTTTTCATTCTCAAC	0.286	0.187	0.362	36
contig.1.cir	m6A	243503	39	+	436	TAACAATCCTAAGAAATTT	TATGTATTAGAcAtgTTTCCAT	0.302	0.209	0.402	27
contig.1.cir	m6A	299521	27	+	419	TTGAGACAATGTTGGTAAG	TATTCAAcAtgATGAAGATTAT	0.254	0.179	0.319	18
contig.1.cir	m6A	134291	43	-	519	ATATTTATCTAATCCTAGG	TATTCAGcAtgACTCGAAGTAT	0.289	0.224	0.356	35
contig.1.cir	m6A	671801	26	-	690	ATTGATAAATTCAACATAA	TATTGAAcAtgATTCTTGTTTA	0.421	0.337	0.494	22
contig.1.cir	m6A	151969	92	+	517	ATAAAAAGCAAACACAACT	TATTGAAcAtgTAATTAATTCT	0.79	0.684	0.881	78
contig.1.cir	m6A	532025	27	-	539	GAACTAAATCTAAAACAAT	TATTGAAcAtgTTGATGTGATT	0.496	0.396	0.598	58
contig.1.cir	m6A	488499	43	+	533	TGTTTTAGAAGTAGCATTA	TATTGAGcAtgAAATGAATCAT	0.433	0.358	0.512	68
contig.1.cir	m6A	351813	28	-	405	AAAATTGTTTTGGAAACAT	TATTTAAcAtgcAtgAAGTTGA	0.29	0.199	0.376	3
contig.1.cir	m6A	103451	123	-	573	TGCTTTAATACGCCcAtgG	TATTTAGCACCATTTTTGTTAA	0.325	0.257	0.403	31
contig.1.cir	m6A	563859	128	-	627	AGGGGATTGATCAAAAATT	TATTTAGCATTAATAAATcAtg	0.362	0.297	0.434	81
contig.1.cir	m6A	566765	47	-	639	ATATTCGCGATGTTGATGC	TATTTGTcAtgTCGTTCGCTGT	0.304	0.234	0.375	11
contig.1.cir	m6A	444433	32	+	497	TTATTTTAATAACAAAAAA	AAAAAAAAATCTGCAACcAtgC	0.082	0.023	0.162	19
contig.1.cir	m6A	552874	27	+	546	AAACTTGTCAACcAtgAAT	AAAAATTAATTTAACGACCTTT	0.571	0.553	0.591	262
contig.1.cir	m6A	613825	26	+	628	AGAGcAtgATTTGTTAAAG	AAAAATTTTTTTCTTGTCAAAA	0.035	0.015	0.061	141
contig.1.cir	m6A	245020	23	-	431	ACGCGAATATAGTAAATGT	AAAACAGcAtgTTCTTGTCCAC	0.068	0.02	0.106	215
contig.1.cir	m6A	321460	25	+	424	TGGTTCGTTATGGAAAATT	AAAAGAAACAATCGATcAtgAA	0.031	0.012	0.062	127
contig.1.cir	m6A	313727	20	+	403	cAtgAGAAAATATCTTATT	AAAAGATTATTTATCAATTAAA	0.356	0.248	0.463	37
contig.1.cir	m6A	331755	34	-	472	AGGcAtgTTTAAGTATTTA	AAAAGTAATTTTCAATGCCCTG	0.126	0.076	0.181	124
contig.1.cir	m6A	327257	21	-	459	CTGTTcAtgATTTAATTTC	AAAAGTTTATTTTGATGCTCAT	0.271	0.184	0.353	103
contig.1.cir	m6A	337599	46	+	460	GGCCTCATTTTCACTTGCA	AAAATAGcAtgTAATTCTTGTC	0.218	0.152	0.275	144
contig.1.cir	m6A	557759	35	-	570	GGTGAGGGGACATCTTTTG	AAAATAGTAATGAAGCGcAtgC	0.241	0.186	0.313	97
contig.1.cir	m6A	482181	22	+	504	TGAACCAATTGCTTCTTCA	AAACCAACAACCAAATcAtgTG	0.352	0.239	0.448	4
contig.1.cir	m6A	10330	44	+	581	AACTCCAGCAAAAACTGAT	AAACCACcAtgATTTTTAGCGA	0.315	0.246	0.379	21
contig.1.cir	m6A	555408	26	-	586	TAAAAATTATCATAAATTT	AAAGAAACAACAAATTAcAtgA	0.071	0.035	0.113	46
contig.1.cir	m6A	274754	34	+	448	TATTAATACTAGTTTGATT	AAAGCATCATTTTcAtgTGCAA	0.137	0.075	0.198	109
contig.1.cir	m6A	524887	23	-	534	TTCAAAAACATTAGGAACA	AAAGcAtgAAAAATTATTTTAA	0.023	0.014	0.047	106
contig.1.cir	m6A	407593	88	+	487	TAAAAATTAATAATTAATT	AAAGcAtgAACTTTTCCACTTA	0.12	0.073	0.163	93
contig.1.cir	m6A	105569	46	+	528	GCTGAATTTTTAGATAAAC	AAAGcAtgGGTTATTATGTGAT	0.184	0.133	0.236	84
contig.1.cir	m6A	525861	36	+	593	TGGGAATAATGATGGTTTT	AAAGcAtgTAATCACACAAAAC	0.122	0.065	0.188	204
contig.1.cir	m6A	344652	40	+	427	AATATTTAATTTTGTTAAT	AAAGcAtgTAGTAAAGCTTTTG	0.192	0.136	0.255	21
contig.1.cir	m6A	486023	29	+	513	AGCTTCTTGAATCATTTTA	AAAGCATTAATAACTTcAtgTT	0.05	0.017	0.087	4
contig.1.cir	m6A	47883	20	+	554	GGCAGGGCGTcAtgGAAAT	AAAGGAATTGTATCAAAAGTTG	0.086	0.051	0.124	73
contig.1.cir	m6A	337505	34	-	441	TTTGTGTATACCTGTTATT	AAAGGATTAAAAACACcAtgAG	0.141	0.088	0.2	158
contig.1.cir	m6A	416048	32	+	451	AAGATATGGATGAATATGC	AAATAAGcAtgGTTATAGTGCA	0.088	0.047	0.137	10
contig.1.cir	m6A	350374	55	+	433	TAATTAAAATAAACATTCC	AAATCAAcAtgAAACTACTGGC	0.327	0.252	0.402	61
contig.1.cir	m6A	58986	23	+	540	ATGGATGAGcAtgGTCAAA	AAATCCAACAAAAAGCTTTTGA	0.05	0.027	0.076	48
contig.1.cir	m6A	731589	317	+	344	GCTTTTcAtgATTTTTATG	AAATGAAATGATAATTTAGAAG	0.74	0.665	0.827	238
contig.1.cir	m6A	420734	30	-	486	TAAAGCCACTGATGATAGT	AAATGAAcAtgATTAGCATTAG	0.435	0.359	0.516	65
contig.1.cir	m6A	456168	22	+	504	CCTGTAATAAGAAGTGTAA	AAATGAAcAtgATTGATATTAC	0.37	0.294	0.45	123
contig.1.cir	m6A	143746	43	-	505	TAAATCATTTCAAACTAAC	AAATGCTcAtgATAATTAGAAA	0.606	0.526	0.705	7
contig.1.cir	m6A	482223	54	+	504	TTTTTTACGATTGGCAATT	AAATTACcAtgATTTTTAAAAC	0.723	0.636	0.803	235
contig.1.cir	m6A	106178	32	-	571	TTTTAGAATTGCACGAAAT	AAATTACCTGTGGAAAcAtgTT	0.682	0.616	0.754	223
contig.1.cir	m6A	375611	39	-	417	TGCTTATTTTAATACATCA	AAATTAGCAAATAATcAtgATT	0.11	0.052	0.175	85
contig.1.cir	m6A	605563	39	-	604	AGGATATGTGcAtgGTTGC	AAATTAGCAATTGTTAATAAAA	0.235	0.181	0.291	235
contig.1.cir	m6A	473711	46	-	537	CGAACATACAATGATTGAG	AAATTAGCAcAtgAAATTATTG	0.186	0.14	0.225	78
contig.1.cir	m6A	139742	28	+	522	AGATGAAGTAACGATTAAA	AAATTAGcAtgATCTTGTGGAT	0.259	0.194	0.327	67
contig.1.cir	m6A	412678	131	+	468	AATGGTACGATGATTAAAA	AAATTAGcAtgGGAGCAAGAAA	0.527	0.437	0.61	128
contig.1.cir	m6A	391889	239	+	425	ATCTTTATAATCAATAAAT	AAATTAGcAtgGTCTGCAAAAA	0.68	0.603	0.76	166
contig.1.cir	m6A	484710	28	-	530	TGTTcAtgAAATGTTAAAA	AAATTAGTAAAAAATACTACTC	0.061	0.028	0.098	81
contig.1.cir	m6A	10734	34	-	614	ATTAAACAATcAtgGTTCT	AAATTAGTACTTGAGGTTTCTC	0.128	0.075	0.178	72
contig.1.cir	m6A	691050	56	-	694	GGCGTGGAACTTCTCAAAT	AAATTGCcAtgATGAAAAATAT	0.384	0.323	0.442	158
contig.1.cir	m6A	193234	39	-	429	TATAAAATTATTAATATCA	AACATACcAtgATTTTTTAAAA	0.449	0.344	0.543	4
contig.1.cir	m6A	276861	21	-	401	CTGCTTCATCTTGACCAAT	AAcAtgACTAGCAATTCGTTTG	0.259	0.193	0.332	151
contig.1.cir	m6A	621609	21	+	549	ATAAACAAGAAGACGCTAA	AAcAtgATTTAAAAAATACGAT	0.32	0.19	0.443	57
contig.1.cir	m6A	626157	79	+	578	TTTGGTTTTCGAAGTAAAG	AAcAtgGCAAAAATCTTTTAAA	0.255	0.192	0.315	17
contig.1.cir	m6A	562840	61	+	523	TTTTTGGTAATAAATCATA	AAcAtgTCAACTAATAGCTTCA	0.18	0.121	0.252	11
contig.1.cir	m6A	571370	67	+	571	TTTTAAAATTATTTTTAAT	AAcAtgTcAtgAATTATCATCA	0.433	0.335	0.531	55
contig.1.cir	m6A	151016	23	-	450	CGGTAATTTTATCAACTAA	AAcAtgTGATAATTGTTCTAAT	0.415	0.331	0.497	159
contig.1.cir	m6A	512472	40	+	471	TTCTAAATCTTTAGGATTT	AAcAtgTTAATTAATTCTTTTT	0.153	0.098	0.209	11
contig.1.cir	m6A	432850	23	-	404	AATCATACATATAAACTAA	AAcAtgTTATTAGTTTAGAAGA	0.511	0.371	0.624	4
contig.1.cir	m6A	192101	20	+	442	GTTTCAATTATTGTTAATG	AAcAtgTTTATAATAAAGAATT	0.867	0.86	0.874	46
contig.1.cir	m6A	318208	89	-	423	TATTTCTAAATATACAATT	AACCCAGCTATTGCAcAtgGTG	0.197	0.139	0.262	65
contig.1.cir	m6A	519296	22	-	540	TcAtgAATCTGCAACTGTT	AACCCATCATTTGGCCCTGACA	0.332	0.261	0.379	6
contig.1.cir	m6A	630832	42	-	589	GATCTTTGCCAATTGCATC	AACCcAtgAAACACTTTTTCCA	0.375	0.317	0.44	90
contig.1.cir	m6A	413658	126	-	453	ATAATCTcAtgCGTTAGCT	AACCCATTATATATTTCTGAAT	0.563	0.47	0.665	90
contig.1.cir	m6A	168625	31	-	404	GCTGGCCTGGTAGGGATCG	AACCTACGcAtgGAAGAATCAA	0.159	0.1	0.224	96
contig.1.cir	m6A	552886	22	+	544	cAtgAATAAAAATTAATTT	AACGACCTTTTTGCTTAATTTC	0.158	0.108	0.219	17
contig.1.cir	m6A	338978	24	-	443	AcAtgAAATTTGAGGGTGG	AACTCCGcAtgTTGCTGGTTTT	0.854	0.852	0.858	189
contig.1.cir	m6A	449449	38	-	518	AAGGTTTTGAAGAAAATAC	AACTGAAcAtgTTGTTTTTGGA	0.598	0.519	0.701	12
contig.1.cir	m6A	119768	37	-	512	CATCTGAAGCTTcAtgAAT	AACTGATTTAAAAACATCAGAA	0.258	0.17	0.331	73
contig.1.cir	m6A	646325	43	+	614	AATGAATGATAATcAtgTT	AACTTACCATTAATTAGTAAAT	0.489	0.401	0.573	71
contig.1.cir	m6A	620673	47	+	562	AAGGCCAACAcAtgGGTAA	AACTTGACAACAAGTACGTCCT	0.243	0.16	0.333	91
contig.1.cir	m6A	538626	68	-	526	ACGTGATTTTcAtgCAAAT	AAGAAAAAAATTATTCCTTTAG	0.124	0.071	0.175	101
contig.1.cir	m6A	413304	28	-	423	ATAAGACcAtgATCAGCCA	AAGAAAAAGTTTTAATATTTTT	0.015	0	0.023	7
contig.1.cir	m6A	294117	31	-	357	CGTCATcAtgAATCAAAAA	AAGAAAAATTTAAAATGATTCA	0.092	0.052	0.148	12
contig.1.cir	m6A	613822	20	+	576	ACAAGAGcAtgATTTGTTA	AAGAAAAATTTTTTTCTTGTCA	0.575	0.568	0.582	98
contig.1.cir	m6A	414345	21	+	431	GATTAGACTTAAATAATTT	AAGAAAAcAtgAACATCCCAGA	0.18	0.056	0.29	5
contig.1.cir	m6A	258752	21	+	408	AACTGcAtgTAGTGACAAT	AAGAAAACTAAAAAAACAATCA	0.127	0.068	0.192	11
contig.1.cir	m6A	697638	50	-	636	AcAtgGATTTAGCAAAATT	AAGAAAACTTTATGAATTTGTA	0.106	0.068	0.145	27
contig.1.cir	m6A	314919	29	-	389	TTGCTcAtgATTATTTTAG	AAGAAAATTATTCAATAAAAAA	0.453	0.432	0.478	147
contig.1.cir	m6A	641096	26	+	488	TTTTTAGTTAcAtgCGCAA	AAGAGAAAAAAATAAAGCAAGA	0.226	0.195	0.267	97
contig.1.cir	m6A	642531	144	+	499	ATcAtgAATACGAGCAATT	AAGAGAAAAAATACTGATTAAA	0.174	0.122	0.245	148
contig.1.cir	m6A	588980	22	-	486	ATTcAtgAACAAACATTAG	AAGAGAAACGAAAAGGTAATGC	0.579	0.563	0.595	41
contig.1.cir	m6A	670426	33	+	580	TTAAAGCTTcAtgTTTAAT	AAGAGAATATATGGGTGAAAAA	0.25	0.178	0.328	45
contig.1.cir	m6A	151991	58	-	392	GTAATTGTTTATCTTTTAA	AAGAGAATTAATTAcAtgTTCA	0.279	0.228	0.34	159
contig.1.cir	m6A	666819	26	+	601	ATTTAGGcAtgCGCAAAAT	AAGAGGAAAATAAACTGCAGCA	0.072	0.037	0.11	62
contig.1.cir	m6A	397239	22	-	429	TATAAGGAGTTTAGTTTTG	AAGATAAAAATTGCTTcAtgAG	0.658	0.642	0.678	93
contig.1.cir	m6A	200470	42	+	401	cAtgATTTAACTCAAAAAA	AAGATAAATAAAAAAAGGAATT	0.14	0.088	0.195	94
contig.1.cir	m6A	25063	52	-	570	TTGTAGATAAAAAcAtgCG	AAGATCGcAtgTGATAATTCCT	0.27	0.201	0.328	117
contig.1.cir	m6A	411861	21	+	434	AAAATcAtgTTTGCTTTAC	AAGATGAAATTTTAAATGAATT	0.058	0.027	0.095	16
contig.1.cir	m6A	403658	145	+	416	GTATAAATCTAATTCTTTT	AAGATGGcAtgCATTGGTAAAT	0.564	0.454	0.666	109
contig.1.cir	m6A	602364	33	-	543	TCCTAAGAAATGAAATCCT	AAGATGGCTAGTTACATCcAtg	0.466	0.343	0.535	36
contig.1.cir	m6A	570348	20	-	571	TTTGTGTCTGATTATGAAA	AAGATGGTTATTGGCCAcAtgC	0.307	0.283	0.336	25
contig.1.cir	m6A	77898	22	+	524	AATTATTCATCGTGATTTA	AAGCCAGAAAATTGcAtgATTA	0.061	0.012	0.102	8
contig.1.cir	m6A	359193	35	+	419	CATATTGCAATGGCTAAAC	AAGCcAtgAAGTTAGTTAATGC	0.015	0	0.015	66
contig.1.cir	m6A	580133	20	+	520	AAAGTTAATAAcAtgATTA	AAGCTAAAAAAATGGGAATGAG	0.032	0.013	0.056	45
contig.1.cir	m6A	137089	38	-	496	CTTTCATCCATATCTcAtg	AAGCTAAAATTCGTACAGTTGC	0.417	0.283	0.437	133
contig.1.cir	m6A	315053	26	-	406	TAAAATTCGTGATTTAGTT	AAGGAAAAATATCCTGAcAtgG	0.072	0.036	0.11	21
contig.1.cir	m6A	404048	78	-	430	AATGACcAtgAACAAAATT	AAGGAAATTTATGAAGAATAAT	0.181	0.128	0.238	91
contig.1.cir	m6A	170728	22	-	398	TTTATTTcAtgCTTATATA	AAGGAATTAATTCATCATTAAC	0.078	0.02	0.145	19
contig.1.cir	m6A	337504	20	-	425	TTGTGTATACCTGTTATTA	AAGGATTAAAAACACcAtgAGA	0.047	0.018	0.078	54
contig.1.cir	m6A	694629	151	-	601	cAtgATAATCTAATTATTA	AAGGCAACAATTTAATTGCTCT	0.432	0.37	0.495	189
contig.1.cir	m6A	443413	123	+	469	ATACTTTTTAGCATTTGAT	AAGGcAtgACTAATAATCATTG	0.485	0.382	0.56	93
contig.1.cir	m6A	553104	93	+	518	GCAATTGAACTTGAAATTA	AAGGcAtgATTGCATTATTATG	0.167	0.121	0.223	174
contig.1.cir	m6A	207611	55	-	398	TGAAGGACTAATTTCGCTA	AAGGcAtgATTTAATTTGTAGG	0.105	0.058	0.163	82
contig.1.cir	m6A	569412	88	+	544	ATGACCAATATcAtgTAAT	AAGGCTGCAGCACAAACAATCT	0.108	0.073	0.147	5
contig.1.cir	m6A	347981	40	-	337	ATAAAcAtgAATAATAAAA	AAGGTAAAAAATTTTATGATTT	0.186	0.13	0.252	90
contig.1.cir	m6A	25601	20	+	530	ATATTAAcAtgATCATTAT	AAGGTAACAAGCTGTTTTTATT	0.33	0.249	0.403	48
contig.1.cir	m6A	507187	214	-	487	ATTAAAATTCGAGCCTTTG	AAGGTAAGAATCAAAAAcAtgA	0.497	0.415	0.576	382
contig.1.cir	m6A	371900	297	+	408	TTTTTATATTATGGAAAAT	AAGGTATTATTAGCAGAAcAtg	0.981	0.909	0.997	351
contig.1.cir	m6A	51718	67	+	523	cAtgATTGTGGCACAAAAG	AAGGTATTATTGTTCGTGAAAT	0.501	0.408	0.586	56
contig.1.cir	m6A	465858	171	+	483	ACCAAATAGTTGAGCAAAC	AAGGTATTTTcAtgAATGTTTG	0.665	0.586	0.747	255
contig.1.cir	m6A	17465	50	+	559	CAAAATGTAAATAGTACAT	AAGGTGCTAATTTAAcAtgTTT	0.349	0.289	0.416	11
contig.1.cir	m6A	569844	53	-	615	CAAATAATAACTAATAACA	AAGGTGCTAATTTATAcAtgCC	0.299	0.241	0.362	78
contig.1.cir	m6A	340398	132	+	425	AGCGAACTATATGATACTG	AAGGTGGTAGTGAAAAATcAtg	0.601	0.52	0.678	78
contig.1.cir	m6A	108939	27	+	486	cAtgAATTTCAACCATACG	AAGGTGTTAAAGAAGACATTAC	0.264	0.173	0.36	43
contig.1.cir	m6A	709794	103	+	564	GAcAtgATTATTAGTGTTG	AAGGTGTTAATAAAGTTAATGA	0.504	0.435	0.572	57
contig.1.cir	m6A	293441	41	-	385	TTTGGCcAtgATGGTCCAC	AAGGTTTTAGCAGTGCTAGTGG	0.262	0.187	0.34	75
contig.1.cir	m6A	533373	24	-	531	AAACAAAATGCTGTTGACC	AAGGTTTTGATAAAGACcAtgT	0.237	0.169	0.31	72
contig.1.cir	m6A	97848	24	+	473	TCAAAAcAtgATCTAGAAG	AAGTCAAATTTTTCCAAACTTT	0.376	0.36	0.395	120
contig.1.cir	m6A	65699	79	-	533	AGAAcAtgACCCGCAATGT	AAGTCACTAGATGTTAATAGCA	0.221	0.162	0.286	50
contig.1.cir	m6A	149320	50	-	466	TGATTCAGAACTATGAATT	AAGTcAtgAACAACTTCTTTGA	0.068	0.035	0.107	68
contig.1.cir	m6A	318790	56	+	396	CTCAGTCTTcAtgGATTTT	AAGTCCACAAGCTCCAGCAGCA	0.194	0.108	0.279	66
contig.1.cir	m6A	298145	27	+	416	GTGTTGTTCCTGAATTAGC	AAGTCGTTATcAtgAACAAAAT	0.031	0.015	0.057	8
contig.1.cir	m6A	259939	24	+	420	TAAATGGTGAATTATCAAC	AAGTGGAcAtgAAGAAAATCAA	0.746	0.66	0.834	344
contig.1.cir	m6A	347525	53	-	385	ACTAAAAAAGAAAGCGAGT	AAGTGTTcAtgGATGTTATTAA	0.233	0.167	0.31	3
contig.1.cir	m6A	243211	27	-	411	AATTTTTTcAtgGTTTAAA	AAGTGTTGTTTTAATAATGCAT	0.201	0.161	0.242	46
contig.1.cir	m6A	656438	159	+	632	cAtgTTGAGTTCTATAAAT	AAGTTAAAAAATAAATTAAAAA	0.276	0.223	0.327	156
contig.1.cir	m6A	624816	61	+	560	TcAtgTACAAATAAAAGTA	AAGTTAAAAAATCATCATCTTT	0.154	0.111	0.199	121
contig.1.cir	m6A	423559	41	-	448	ACAACAATTAGTTCAcAtg	AAGTTAAAAATATTACTTCAAC	0.18	0.085	0.277	52
contig.1.cir	m6A	481214	180	+	471	TAAAGATATTTATGAAAAT	AAGTTAAAAATTcAtgGCAAAG	0.369	0.299	0.432	217
contig.1.cir	m6A	339453	20	+	461	TTAGAAGcAtgTTCAATAT	AAGTTAAAATAATTTCATCACC	0.081	0.029	0.153	37
contig.1.cir	m6A	646327	60	-	673	TAATTTACTAATTAATGGT	AAGTTAAcAtgATTATCATTCA	0.413	0.334	0.475	127
contig.1.cir	m6A	546629	25	-	571	ATCATTTAAATAATAAGCT	AAGTTAGGATCTTcAtgGACAC	0.112	0.07	0.165	86
contig.1.cir	m6A	198343	172	+	444	TTGCTATTGGTATTAAATT	AAGTTAGTAACAACTTcAtgAG	0.431	0.358	0.501	48
contig.1.cir	m6A	2623	246	+	384	AACACTTATATTGGTGAAC	AAGTTAGTATTcAtgGTGGTGG	0.638	0.553	0.728	296
contig.1.cir	m6A	359201	38	+	401	AATGGCTAAACAAGCcAtg	AAGTTAGTTAATGCTGACAAAC	0.383	0.099	0.459	20
contig.1.cir	m6A	551050	45	-	571	TGATCAAAAAGAAcAtgAT	AAGTTATTGAATTTATCAAAAA	0.193	0.121	0.267	81
contig.1.cir	m6A	695344	26	-	620	cAtgATAATCAATTATTAA	AAGTTCAAGAATTTGTTTGCAA	0.336	0.313	0.362	93
contig.1.cir	m6A	592294	176	+	598	TTcAtgTGTAATGCCTAAT	AAGTTGGCAATAAATGCTGATG	0.47	0.403	0.542	79
contig.1.cir	m6A	95179	98	+	478	AAATCATTATTAGGAACAA	AAGTTGGcAtgACTCAAGTTTT	0.416	0.343	0.492	215
contig.1.cir	m6A	337882	129	+	439	AATTCACTTAAAGGAATTA	AAGTTGGcAtgGCAAGATTGCG	0.384	0.306	0.47	145
contig.1.cir	m6A	63662	21	+	520	CCTTAcAtgCGTGATATTA	AAGTTTTCAAACCACAAATTTA	0.078	0.021	0.152	8
contig.1.cir	m6A	568771	21	+	558	TGTAACCAATTTGTTGCTA	AAGTTTTTAAAATAAAATcAtg	0.447	0.432	0.463	97
contig.1.cir	m6A	217931	28	+	434	TAAAATCTTATTGGTTAAC	AATAAAGCACAAcAtgTTACTA	0.12	0.054	0.191	73
contig.1.cir	m6A	580107	70	-	576	cAtgTTATTAACTTTGCAG	AATAGAACAATAAATGAAGTTA	0.469	0.397	0.54	183
contig.1.cir	m6A	297988	29	+	381	AAAGTAATTAATAAAATAA	AATAGAAcAtgAATGATAATTA	0.4	0.298	0.5	52
contig.1.cir	m6A	96561	34	-	548	cAtgCTCGCTTTTATTACG	AATAGAATAAGTTTTTTCTGTC	0.256	0.173	0.347	31
contig.1.cir	m6A	468944	53	+	447	ATTcAtgAACTAATGTTAA	AATAGAATTATAAGTTTCATCA	0.492	0.384	0.591	39
contig.1.cir	m6A	193437	30	+	428	AAATTATTAcAtgAAAAAA	AATATAACAAAAACGTTATATC	0.462	0.349	0.585	38
contig.1.cir	m6A	98915	22	+	469	AATCCAAAAGATCTTAGCG	AATATAAcAtgACTAAAGGTCC	0.458	0.366	0.54	56
contig.1.cir	m6A	296305	54	+	417	GACTATTATGcAtgTAAAA	AATATGGTATTGAAACAGTAGT	0.594	0.477	0.723	14
contig.1.cir	m6A	257492	135	+	377	TGATATTTTAGGAcAtgAT	AATCCAACAATTTTAAAACTTT	0.514	0.422	0.617	102
contig.1.cir	m6A	456218	34	+	493	TGAATCTATACGATCTAAT	AATCCACcAtgGCCAGGAATTA	0.452	0.343	0.543	27
contig.1.cir	m6A	321469	71	+	405	ATGGAAAATTAAAAGAAAC	AATCGATcAtgAAATTTTATTA	0.49	0.399	0.596	7
contig.1.cir	m6A	377968	145	-	416	ATACcAtgTTTTGCGTAAA	AATCTAGcAtgCCATCATAACT	0.593	0.497	0.691	77
contig.1.cir	m6A	590301	25	-	525	TAATCTTTTTGTTAAAAAA	AATGAAATTcAtgCAATTATTG	0.101	0.036	0.173	5
contig.1.cir	m6A	404470	22	-	434	TAAACAATCAcAtgGAGAT	AATGAAATTTTTTGAATATTTA	0.303	0.183	0.432	28
contig.1.cir	m6A	424020	129	+	439	AGTATCATTAATTTTAGCA	AATGCAGcAtgAATTGGTTTAT	0.276	0.205	0.34	121
contig.1.cir	m6A	50999	29	+	549	ATCAATTTGAAATTATTGG	AATGcAtgAAAGTATTTTAGAT	0.556	0.432	0.647	70
contig.1.cir	m6A	254389	35	+	401	AATTATCAAAAACAACATT	AATGcAtgATTTACAAATTTGA	0.03	0	0.065	24
contig.1.cir	m6A	276254	55	-	437	TAAATTAACAGCAGCAATT	AATGCATTATcAtgGATTTTAA	0.326	0.247	0.415	27
contig.1.cir	m6A	108566	37	+	513	ATCTGTTGAAGTTcAtgTT	AATGGAACAGGTGCAAGTCGTG	0.208	0.135	0.275	45
contig.1.cir	m6A	12135	115	-	581	TAGTAAATTTATTAATCAT	AATGGAAcAtgAGGATTTGTAA	0.512	0.448	0.575	193
contig.1.cir	m6A	14295	20	-	588	AACTTGAAGCTcAtgGAGC	AATGGAATATACAACTGTTGTT	0.866	0.771	0.871	179
contig.1.cir	m6A	590274	24	-	530	TcAtgCAATTATTGGTGAA	AATGGAGCAGGTAAATCAACCT	0.275	0.191	0.304	14
contig.1.cir	m6A	204205	27	+	450	TGTTTATAATCGTGTAGAT	AATGTACCAGTATATGCGcAtg	0.534	0.42	0.644	14
contig.1.cir	m6A	506076	76	+	513	AAACGcAtgAATTTTAGAT	AATGTACCTGTGTAGTATTCAT	0.555	0.462	0.65	44
contig.1.cir	m6A	186365	145	-	431	TGTGCCATTTTGAACTAAC	AATGTAGCAAGAGGACcAtgAC	0.491	0.41	0.568	91
contig.1.cir	m6A	523205	27	-	510	ATTTTGAAcAtgAACCTGA	AATGTATcAtgTAAGTGAAACT	0.387	0.302	0.474	5
contig.1.cir	m6A	597782	20	-	533	AAAATTAAATGAGTATAAA	AATTAAGcAtgATCAAAATTTA	0.203	0.167	0.24	9
contig.1.cir	m6A	550056	22	-	543	AAAATTTTCGTCTTcAtgC	AATTCAATAACTTCAATATTTT	0.124	0.058	0.193	63
contig.1.cir	m6A	469818	37	-	483	TGCTTGCTTGGTCTCAAAA	AATTGAAcAtgAACAACATCGT	0.675	0.595	0.757	177
contig.1.cir	m6A	85456	20	+	505	AACTATTAGATGAACATCA	AATTGAAcAtgCACGTTCTTAT	0.371	0.282	0.466	114
contig.1.cir	m6A	212979	30	+	450	AAcAtgAAGTTAATGCTGA	AATTGAAcAtgCATTAAATTCT	0.446	0.34	0.55	74
contig.1.cir	m6A	13005	45	-	559	TCTTAGTACCAGTTGCTGA	AATTGAGcAtgATGAAGCAATT	0.429	0.341	0.524	6
contig.1.cir	m6A	433858	27	-	417	GAAATTAAATTAAACcAtg	AATTGAGTAATCAGTATTTGAC	0.296	0.167	0.452	24
contig.1.cir	m6A	656921	56	-	659	CATCAAAATAATTTCTACT	AATTGTGcAtgAATATTTTGCT	0.279	0.196	0.365	25
contig.1.cir	m6A	502790	96	+	492	TATTTcAtgCTCATCATTT	AATTTAACAATCAGATTAGTTA	0.474	0.393	0.563	22
contig.1.cir	m6A	17473	27	+	565	AAATAGTACATAAGGTGCT	AATTTAAcAtgTTTAGCGCCCA	0.297	0.219	0.39	34
contig.1.cir	m6A	607907	123	+	598	TcAtgTTATGGGCTGATCG	AATTTAGCAATCTCAAAAGATA	0.394	0.321	0.466	73
contig.1.cir	m6A	296010	86	+	400	TCcAtgAACATTACCAGCT	AATTTAGCAATTGCAATTCATC	0.215	0.14	0.285	19
contig.1.cir	m6A	553601	172	+	529	AAGAATTGCTGGGAAAAAT	AATTTAGCAGCTGTTTTcAtgA	0.446	0.366	0.521	172
contig.1.cir	m6A	502444	158	-	502	AAATTGTGATTTAATTTTA	AATTTAGCAGTTcAtgATATAA	0.474	0.401	0.545	104
contig.1.cir	m6A	605990	210	+	587	TTTATTAATTCTTGTGATT	AATTTAGcAtgTTTGTTAATTG	0.636	0.56	0.71	179
contig.1.cir	m6A	270334	80	+	418	ACAAGAAATTCCTTTAATT	AATTTAGCATTATcAtgAACAT	0.339	0.25	0.429	42
contig.1.cir	m6A	633642	28	+	627	AAACATTCAACCGAAAATG	AATTTAGTACAAATcAtgTTGT	0.076	0.042	0.117	49
contig.1.cir	m6A	300387	56	+	401	TTTGAATAATTGTTCCACA	AATTTGGcAtgGTTCTTTAGCG	0.306	0.214	0.392	3
contig.1.cir	m6A	631998	75	+	626	AAAAAAATGAATTAGTGGG	AATTTGGcAtgTTGGTAATGGT	0.29	0.228	0.376	153
contig.1.cir	m6A	508843	50	-	594	AACTTcAtgTTATTGTTAG	CAAAGAATAATAATTATGCCAA	0.127	0.08	0.177	74
contig.1.cir	m6A	482635	32	-	521	GGTCATcAtgGAACAACAA	CAAAGGAcAtgATTCCTTTTTT	0.265	0.202	0.335	67
contig.1.cir	m6A	566762	49	+	573	AAAACAGCGAACGAcAtgA	CAAATAGCATCAACATCGCGAA	0.238	0.18	0.293	112
contig.1.cir	m6A	318054	20	-	449	CGTTGTGTAGCAGGTGATC	CAAATGCTTCAATTCCAAcAtg	0.158	0	0.382	162
contig.1.cir	m6A	97686	20	+	510	CGCAACAATAAGAAATCAT	CAACGAGcAtgATTGTTCGTCG	0.155	0.098	0.216	19
contig.1.cir	m6A	96517	23	+	521	TAAATAATcAtgGAATTAA	CAAGAGTTATTTTACATCCATA	0.026	0	0.064	66
contig.1.cir	m6A	47043	42	+	558	GGGGTCAAAcAtgCAACGT	CAAGCAACACCTTTAATTAAAC	0.096	0.059	0.136	80
contig.1.cir	m6A	413258	82	+	473	TGGAGTTAATTTTAATTTT	CAAGcAtgTGTTCATTGTAATA	0.137	0.088	0.181	34
contig.1.cir	m6A	383333	23	+	423	ATTTCTTAAATcAtgTGTT	CAAGTACCAATGTTTTTTGATT	0.196	0.126	0.263	4
contig.1.cir	m6A	455584	76	-	494	AcAtgTGCTAGTGGTTCAT	CAAGTAGTAATAATTTATTTTT	0.368	0.303	0.434	36
contig.1.cir	m6A	638005	24	+	621	TTGCTTATTTATTAATTAG	CAATGAAcAtgCTAATATTAAT	0.397	0.321	0.472	64
contig.1.cir	m6A	259958	42	+	434	AAGTGGAcAtgAAGAAAAT	CAATTAGCTTTATATTTATCAG	0.127	0.079	0.178	5
contig.1.cir	m6A	83695	52	+	553	AATCcAtgGATTTTTTTAC	CAATTAGTATTTATTGTGTCTT	0.194	0.109	0.262	9
contig.1.cir	m6A	605553	22	+	617	AATTGATTGTTTTTATTAA	CAATTGCTAATTTGCAACcAtg	0.064	0.03	0.098	4
contig.1.cir	m6A	605556	33	-	600	GTGcAtgGTTGCAAATTAG	CAATTGTTAATAAAAACAATCA	0.089	0.052	0.129	124
contig.1.cir	m6A	139419	28	+	538	AAAACTGTTCAAACTATTC	CAcAtgTCACATCTGCAGTTAT	0.112	0.061	0.159	25
contig.1.cir	m6A	577605	128	-	608	TCAATAATCTCATCTAACT	CACCCATcAtgATTTGGTCTAA	0.619	0.546	0.708	140
contig.1.cir	m6A	533517	216	-	562	TTAACAGTTTATGAAAATT	CACCTAACAAAAAGATTcAtgC	0.839	0.78	0.913	521
contig.1.cir	m6A	306371	99	-	407	GATTcAtgTAGCTTGTTTG	CACCTAAGAATCCAACAACCAA	0.079	0.041	0.119	37
contig.1.cir	m6A	163974	27	-	405	GCTGACGACAACcAtgCAC	CACCTGTCATATTGTTAACCTC	0.209	0.13	0.289	58
contig.1.cir	m6A	717927	22	-	577	GCTGACGACAACcAtgCAC	CACCTGTCATATTGTTAACCTC	0.544	0.458	0.615	101
contig.1.cir	m6A	299158	28	+	418	TTATTGCTGGGGAAATTAC	CACGcAtgCATATGTTGATGTA	0.015	0	0.015	34
contig.1.cir	m6A	483504	60	+	518	TTTTAAAAAATTCAAAAAT	CACTTGACGAcAtgCACCACAA	0.408	0.334	0.489	165
contig.1.cir	m6A	414363	43	+	472	TAAGAAAAcAtgAACATCC	CAGAGAAGAATTATCACACTAT	0.167	0.114	0.224	140
contig.1.cir	m6A	109809	55	-	558	GAACcAtgACTTATAACAT	CAGATACTTGTTGACGACTCAC	0.306	0.243	0.383	63
contig.1.cir	m6A	81097	46	+	577	ATGGAGCAATATGAATTAG	CAGATAGTAcAtgACACTCAAG	0.172	0.102	0.219	46
contig.1.cir	m6A	599188	161	-	592	AAAATTGTTGGGAcAtgAG	CAGATAGTATTGATCATTTAAT	0.545	0.471	0.625	138
contig.1.cir	m6A	444443	20	-	530	ACTAAAATCTGcAtgGTTG	CAGATTTTTTTTTTTTTTTGTT	0.748	0.745	0.753	291
contig.1.cir	m6A	84690	36	+	557	GATTTCcAtgCGATTACTG	CAGCTAATAATTTAATCGTTGC	0.086	0.052	0.123	38
contig.1.cir	m6A	66289	20	+	553	CTAcAtgGTTTTTTTGAAA	CAGCTTGcAtgATTATAGCGAC	0.585	0.579	0.586	97
contig.1.cir	m6A	553	20	+	297	TCTTTAGAATTTTTATTAA	CAGCTTTTGGAATTCGTcAtgT	0.071	0.025	0.12	14
contig.1.cir	m6A	124173	46	-	523	TGcAtgACGTTTTTTAGGT	CAGGGGTCAGAAAAATTTAAAT	0.09	0.047	0.135	9
contig.1.cir	m6A	436389	26	-	453	ATAATcAtgAGTCGTTATA	CAGGTAGTATTTATAAAAAATC	0.124	0.083	0.173	8
contig.1.cir	m6A	81121	41	+	581	AGTAcAtgACACTCAAGCA	CAGGTGTTAAGTATTCATTGCT	0.054	0.023	0.09	63
contig.1.cir	m6A	78712	32	+	579	AAGGGATTTTTAAACATAA	CAGTcAtgAATTAAAACCAATG	0.015	0	0.026	81
contig.1.cir	m6A	124204	30	-	531	CTAAAAAACACGGATGTGT	CAGTCGTTTTTTTGcAtgACGT	0.663	0.544	0.663	101
contig.1.cir	m6A	649046	30	-	671	GCAGTTAAAAACTTTTTTT	CAGTGATcAtgTCTAATGCGCT	0.296	0.225	0.36	75
contig.1.cir	m6A	24545	39	+	561	CTACCAATAAcAtgATGAT	CAGTTAACATATAATAACGATA	0.191	0.134	0.248	8
contig.1.cir	m6A	17573	54	+	603	CGGTTTGGCACATcAtgTA	CAGTTAACTTTTTAACCATACT	0.071	0.034	0.109	56
contig.1.cir	m6A	262992	56	-	387	CAAACTAAAGAACAAcAtg	CAGTTACTAAATTAGATTTTGA	0.212	0.147	0.283	7
contig.1.cir	m6A	75660	30	+	575	TCCAGATcAtgCAGCAAAC	CAGTTGGCGGAGATTATTCTAA	0.172	0.126	0.215	63
contig.1.cir	m6A	222534	41	+	452	ATGGCTATTATAAAAAAAA	CATAAACTTTcAtgGTTTATTT	0.234	0.15	0.311	49
contig.1.cir	m6A	359755	39	-	410	TAAATGTTTTTCTAATAAT	CATAAAGCATATAAACcAtgTT	0.106	0.05	0.174	36
contig.1.cir	m6A	366317	23	+	413	GATCCTcAtgATATACAAT	CATACACTACAAAACTAAAAAA	0.264	0.167	0.37	52
contig.1.cir	m6A	560961	22	+	520	AATCTAATACTGGAATAAG	CATACGAcAtgGAGGGCATCAA	0.239	0.181	0.303	107
contig.1.cir	m6A	53083	37	+	552	CCTcAtgCTCTAGTTCAAA	CATAGAATCTAAATTAAGTGAT	0.394	0.301	0.501	93
contig.1.cir	m6A	583764	42	+	584	ATCTTAATTCcAtgTTTTG	CATAGAATTCTTTTAGACCGTT	0.175	0.105	0.249	164
contig.1.cir	m6A	339006	38	+	494	TCAAATTTcAtgTAATTAT	CATAGAGCTGATAACTATTTAA	0.132	0.079	0.193	20
contig.1.cir	m6A	355761	50	-	392	ACcAtgCATATCTAATAAA	CATAGATTATTTTTTCAATCTT	0.4	0.249	0.512	37
contig.1.cir	m6A	600957	69	-	595	ATGATTGTAATTGCATTCT	CATATAAcAtgATTTCTTTTGG	0.954	0.839	1	79
contig.1.cir	m6A	39511	22	-	576	TTATTCTTTTCAAAAAAAT	CATATAATTTTCGAACTTcAtg	0.528	0.417	0.666	27
contig.1.cir	m6A	692987	186	-	686	ACAAATTcAtgCATTGTTT	CATATGGCTACAGGTTCTGGTA	0.609	0.544	0.688	199
contig.1.cir	m6A	353416	67	+	422	GTGGTATTATTGCAATTTG	CATCCAAcAtgAAATTGGTCAT	0.418	0.339	0.503	25
contig.1.cir	m6A	576191	126	+	604	GAGAATTATGAGAGATATT	CATCCAGTAAGCAAACcAtgCG	0.31	0.24	0.377	107
contig.1.cir	m6A	143621	25	+	533	GATATGATGTTAGACGCAC	CATCTAAcAtgAATGATGAAGA	0.258	0.198	0.323	10
contig.1.cir	m6A	321492	20	-	446	ATTGATTCAACACCAAAAA	CATCTAATAAAATTTcAtgATC	0.095	0.044	0.152	10
